# Supplementary material for: Influence of Weather Conditions in the Northwestern Russian Federation on Flax Fiber Characters According to the Results of a 30-Year Study
Source: MDPI journal article supplement (doi:10.3390/plants13060762), 2024-03-07
Supplement: s1 [file s1]

**Table S4.** Factor loading (Varimax raw) for 45 characters

| Characters                           | Factor 1 | Factor 2 | Factor 3 | Factor 4 | Factor 5 |
|--------------------------------------|----------|----------|----------|----------|----------|
| may1dAT                              | -0,06    | -0,07    | 0,12     | 0,24     | 0,20     |
| may2dAT                              | 0,49     | -0,28    | 0,22     | 0,44     | -0,15    |
| may3dAT                              | 0,22     | 0,01     | 0,37     | 0,52     | 0,28     |
| mayAT                                | 0,33     | -0,16    | 0,38     | 0,63     | 0,20     |
| jun1dAT                              | 0,17     | 0,07     | 0,73     | 0,14     | -0,27    |
| jun2dAT                              | 0,10     | 0,10     | 0,43     | 0,11     | 0,18     |
| jun3dAT                              | 0,21     | 0,04     | 0,66     | 0,00     | 0,25     |
| junAT                                | 0,23     | 0,10     | 0,89     | 0,13     | 0,04     |
| jul1dAT                              | 0,46     | 0,00     | 0,38     | 0,07     | -0,27    |
| jul2dAT                              | 0,81     | 0,06     | -0,08    | 0,03     | 0,29     |
| jul3dAT                              | 0,82     | -0,12    | -0,10    | 0,23     | -0,01    |
| julAT                                | 0,85     | 0,01     | 0,14     | 0,14     | -0,10    |
| aug1dAT                              | 0,55     | 0,10     | -0,14    | 0,57     | -0,23    |
| aug2dAT                              | -0,07    | 0,10     | 0,06     | 0,82     | 0,04     |
| aug3dAT                              | 0,05     | 0,27     | 0,24     | 0,43     | 0,02     |
| augAT                                | 0,24     | 0,23     | 0,08     | 0,86     | -0,08    |
| may-augAT                            | 0,59     | 0,02     | 0,51     | 0,59     | 0,05     |
| may1dP                               | 0,15     | 0,03     | -0,27    | -0,13    | -0,59    |
| may2dP                               | -0,13    | 0,04     | 0,56     | 0,22     | -0,34    |
| may3dP                               | 0,09     | 0,10     | -0,11    | 0,24     | -0,76    |
| mayP                                 | 0,05     | 0,09     | 0,11     | 0,21     | -0,94    |
| jun1dP                               | 0,07     | -0,30    | -0,26    | -0,31    | -0,13    |
| jun2dP                               | 0,30     | -0,73    | -0,33    | 0,06     | 0,05     |
| jun3dP                               | 0,12     | -0,62    | -0,18    | -0,15    | -0,28    |
| junP                                 | 0,21     | -0,76    | -0,34    | -0,20    | -0,19    |
| jul1dP                               | -0,40    | -0,33    | -0,10    | 0,17     | 0,15     |
| jul2dP                               | 0,47     | -0,08    | 0,14     | -0,04    | 0,36     |
| jul3dP                               | -0,25    | -0,47    | 0,44     | 0,13     | 0,18     |
| julP                                 | -0,30    | -0,53    | 0,25     | 0,18     | 0,30     |
| aug1dP                               | -0,27    | -0,68    | 0,42     | -0,22    | 0,07     |
| aug2dP                               | 0,28     | -0,45    | 0,08     | -0,19    | 0,32     |
| aug3dP                               | -0,02    | -0,65    | -0,21    | 0,29     | 0,33     |
| augP                                 | -0,02    | -0,85    | 0,09     | 0,00     | 0,34     |
| may-augP                             | -0,03    | -0,99    | 0,04     | 0,04     | 0,02     |
| mayHTC                               | -0,16    | 0,16     | -0,14    | -0,23    | -0,87    |
| junHTC                               | 0,17     | -0,73    | -0,45    | -0,20    | -0,18    |
| julHTC                               | -0,52    | -0,52    | 0,17     | 0,16     | 0,31     |
| augHTC                               | -0,07    | -0,84    | 0,09     | -0,17    | 0,29     |
| may-augHTC                           | -0,22    | -0,94    | -0,12    | -0,15    | -0,01    |
| mayET                                | 0,41     | 0,03     | 0,05     | 0,44     | -0,06    |
| junET                                | 0,24     | 0,11     | 0,85     | -0,02    | 0,18     |
| julET                                | 0,89     | 0,02     | 0,05     | 0,06     | -0,04    |
| augET                                | 0,27     | 0,16     | -0,06    | 0,75     | -0,29    |
| may-augET                            | 0,82     | 0,12     | 0,37     | 0,35     | -0,06    |
| jun-julET                            | 0,83     | 0,08     | 0,47     | 0,04     | 0,06     |
| Eigenvalues                          | 7,22     | 7,79     | 5,43     | 4,97     | 4,34     |
| Proportion of variance               | 0,16     | 0,17     | 0,12     | 0,11     | 0,10     |
| Square root from proportion variance | 0,40     | 0,42     | 0,35     | 0,33     | 0,31     |
