# Supplementary material for: Influence of Weather Conditions in the Northwestern Russian Federation on Flax Fiber Characters According to the Results of a 30-Year Study
Source: MDPI journal article supplement (doi:10.3390/plants13060762), 2024-03-07

**Figure S1.** Scree plot showing eigenvalues in response to the number of components for the estimated characters

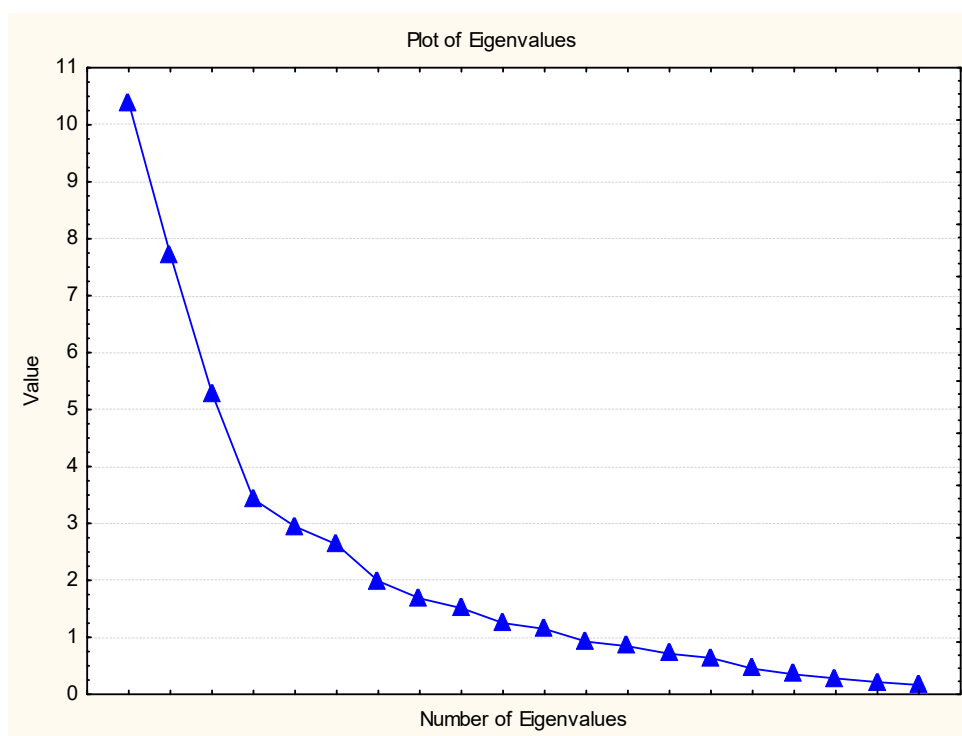

Supplement: s1 [file s1]
