# Supplementary material for: Influence of Weather Conditions in the Northwestern Russian Federation on Flax Fiber Characters According to the Results of a 30-Year Study
Source: Plants (Basel). 2024 Mar 7;13(6):762. doi: 10.3390/plants13060762 (PMC10975659; doi:10.3390/plants13060762)
Supplement: Supplementary file 1 [file plants-13-00762-s001.zip]

Archive with 8 entries (8 files):
- Figure S1.pdf
- Supplement cont.pdf
- Table S1.xlsx
- Table S2.xlsx
- Table S3.xlsx
- Table S4.pdf
- Table S5.pdf
- Table S6.xlsx
