# Supplementary material for: Influence of Weather Conditions in the Northwestern Russian Federation on Flax Fiber Characters According to the Results of a 30-Year Study
Source: Plants (Basel). 2024 Mar 7;13(6):762. doi: 10.3390/plants13060762 (PMC10975659; doi:10.3390/plants13060762)
Supplement: Supplementary file 1 [file plants-13-00762-s001.zip › Table S1.xlsx]

## Sheet: TablS1
Table S1. Temperature, precipitation and hydrothermal coefficient in 1987-2018
year	7Gr	gr1	gr2	gr3	gr4	gr5	gr6	gr7	may1dAT	may2dAT	may3dAT	mayAT	jun1dAT	jun2dAT	jun3dAT	junAT	jul1dAT	jul2dAT	jul3dAT	julAT	aug1dAT	aug2dAT	aug3dAT	augAT	may-augAT	may1dP	may2dP	may3dP	mayP	jun1dP	jun2dP	jun3dP	junP	jul1dP	jul2dP	jul3dP	julP	aug1dP	aug2dP	aug3dP	augP	may-augP	mayHTC	junHTC	julHTC	augHTC	may-augHTC	mayET	junET
1987	2	0	2	0	0	0	0	0	68.6	115.5	36.3	220.4	148.9	152.9	142.6	444.4	168	121.7	189.7	479.4	139.4	119.6	136.1	395.1	1539.3	18.3	20.5	28.3	67.1	30.4	32.6	74.8	137.8	1.3	1.9	41.4	44.6	77.9	51.5	39.3	168.7	418.2	3.04446	3.10081	0.93033	4.26981	2.71758	0	20.4
1988	6	0	0	0	0	0	6	0	42.1	106.6	188.4	337.1	171.1	138.9	222.1	532.1	197.9	228	205.8	631.7	146.8	147.9	172.3	467	1967.9	6.3	8.8	4.5	19.6	8.5	42.8	38	89.3	9	62	43.3	114.3	41.6	51.5	58.7	151.8	375	0.58143	1.67826	1.8094	3.25054	1.90558	21.1	271.1
1989	7	0	0	0	0	0	0	7	76.9	125.7	147.1	349.7	183.3	151.5	215.3	550.1	198.5	163.8	201.7	564	170.6	168.9	114.5	454	1917.8	2.9	25.9	3.7	32.5	9.2	14.1	11.8	35.1	32.2	18.3091	107.3	157.809	100.3	13.5	23.8	137.6	363.009	0.929368	0.638066	2.79803	3.03084	1.89284	20.5	261
1990	4	0	0	0	4	0	0	0	106.1	34.1	34.9	175.1	105.4	103	177	385.4	186.7	155.3	170	512	174.1	174.8	131.4	480.3	1552.8	0.2	19.1	29.8	49.1	0.9	7.7	0.2	8.8	30.4	15.4182	22.2	68.0182	11.6	14.8	27.1	53.5	179.418	2.80411	0.228334	1.32848	1.11389	1.15545	0	21.5
1991	2	0	2	0	0	0	0	0	31.7	120.6	77.2	229.5	110.3	152.1	187	449.4	196.4	177.6	196	570	191.7	152.3	174.9	518.9	1767.8	28.6	12.4	22.4	63.4	47.1	18.6	8.2	73.9	32	17.8091	2.6	52.4091	8.3	44.3	1.7	54.3	244.009	2.76253	1.64441	0.919458	1.04644	1.3803	0	83.2
1992	4	0	0	0	4	0	0	0	42.3	76.9	154.2	273.4	157.9	186.7	156.1	500.7	146	190.3	210.4	546.7	179.7	166.6	161.4	507.7	1828.5	11.1	5.7	0	16.8	0	6.4	18	24.4	22.5	19.2727	11.7	53.4727	0.4	16.2	25.6	42.2	136.873	0.614484	0.487318	0.9781	0.8312	0.748552	41.8	127.8
1994	2	0	2	0	0	0	0	0	53.6	39.6	47.2	140.4	129.6	118.4	159.6	407.6	178.9	207.1	220.2	606.2	200.5	101.2	145.5	447.2	1601.4	13	6.4	23.4	42.8	37.3	28.9	20.3	86.5	48.4	20.3909	0.5	69.2909	3.8	54.7	10.7	69.2	267.791	3.04843	2.12218	1.14304	1.54741	1.67223	0	20.8
1995	3	0	0	3	0	0	0	0	21.5	64.4	195.7	281.6	205.4	198.7	171.1	575.2	139.7	158.4	197.3	495.4	164.6	158.5	188.6	511.7	1863.9	14.9	33	19.8	67.7	31.2	10.7	10.1	52	18.2	17.2182	23	58.4182	31.3	0	0.4	31.7	209.818	2.40412	0.904033	1.17921	0.619504	1.12569	88.4	291.5
1996	3	0	0	3	0	0	0	0	45.6	60.2	108.8	214.6	162.9	129.5	143.9	436.3	174	130.1	179.2	483.3	163.6	192.2	180.3	536.1	1670.3	23.2	17.2	43	83.4	3.6	11.8	18.9	34.3	50.6	16.5455	33.1	100.245	11.4	0.5	0	11.9	229.845	3.8863	0.786156	2.07419	0.221974	1.37607	0	20.4
1997	4	0	0	0	4	0	0	0	24.7	84.8	61.5	171	158.3	152.3	165	475.6	206.9	161.1	219	587	196.6	146.2	220.8	563.6	1797.2	8.9	3.5	25.5	37.9	14	7.6	18.1	39.7	0	19.9364	31.5	51.4364	0	15.5	0	15.5	144.5	2.21637	0.834735	0.876258	0.28	0.8	0	148.9
1998	2	0	2	0	0	0	0	0	106.2	104.7	62.3	273.2	162.1	205.9	113.3	481.3	176.5	178.1	196.3	550.9	160.6	128.5	139.6	428.7	1734.1	17.6	0	17.5	35.1	22	28.7	71.5	122.2	64.4	18	18.9	101.3	49.9	21.1	20.8	91.8	350.4	1.28477	2.53896	1.83881	2.14136	2.02064	0	162.5
1999	6	0	0	0	0	0	6	0	0	20.7	150	170.7	176.7	210.2	229.6	616.5	199.3	224.8	199.1	623.2	178.2	148.1	154	480.3	1890.7	5.3	0.9	16.9	23.1	15.8	0	30.8	46.6	5.3	18.1	10	33.4	17.5	32	22.5	72	175.1	1.35325	0.75588	0.535944	1.49906	0.926112	0	386.1
2000	4	0	0	0	4	0	0	0	37.9	52.2	165.6	255.7	126	147.1	194.2	467.3	173.4	188.3	193.6	555.3	160.5	162.5	167.3	490.3	1768.6	3.7	8.5	19.5	31.7	16	10.5	43.4	69.9	79.5	17.2818	30	126.782	5.4	12.7	24	42.1	270.482	1.23973	1.49583	2.28312	0.858658	1.52936	21.7	129.4
2001	2	0	2	0	0	0	0	0	122.3	66.5	0	188.8	134.4	130.6	177.7	442.7	212	222.6	236.8	671.4	164.4	178	152.5	494.9	1797.8	18.8	10.3	17.6	46.7	38.8	27.7	2.3	68.8	67.7	21.2909	12.3	101.291	22.4	23.2	0.3	45.9	262.691	2.47352	1.5541	1.50865	0.92746	1.46118	0	41
2002	4	0	0	0	4	0	0	0	136.1	90.5	107.8	334.4	162.1	181.1	157.8	501	191.8	219.6	220.9	632.3	174	198	195	567	2034.7	0.5	24.6	6.6	31.7	6.5	19.4	16.8	42.7	24.3	19.4273	29.7	73.4273	9.1	0	0	9.1	156.927	0.947967	0.852295	1.16127	0.160494	0.771255	0	64.7
2004	2	0	2	0	0	0	0	0	120.8	20.7	58.4	199.9	123.7	140.2	172.4	436.3	167.4	179.8	219.2	566.4	211.7	158.2	174.7	544.6	1747.2	0.5	15.1	37.2	52.8	28.2	26.1	62.7	117	69.8	19.4273	33.2	122.427	9.2	31.6	25.8	66.6	358.827	2.64132	2.68164	2.1615	1.22292	2.05373	0	20.3
2005	2	0	2	0	0	0	0	0	0	77.6	176.5	254.1	138.7	165.8	167.4	471.9	189.4	229.4	208.6	627.4	190.5	171.7	188.3	550.5	1903.9	26.2	32	4.4	62.6	43	28.5	36.5	108	33.6	18.6182	54.9	107.118	29.5	16.3	14.9	60.7	338.418	2.4636	2.28862	1.70733	1.10263	1.7775	23.9	21.8
2006	4	0	0	0	4	0	0	0	135.5	79.5	141.1	356.1	98.9	203.6	201.8	504.3	225.7	191.9	182.3	599.9	180	199.4	192	571.4	2031.7	0	20.7	33	53.7	29.2	2.7	23.5	55.4	33.1	16.5364	2.1	51.7364	9.7	1.8	24.9	36.4	197.236	1.508	1.09855	0.862416	0.637032	0.970795	0	254.4
2007	3	0	0	3	0	0	0	0	23.7	136.8	193.2	353.7	165.8	157.2	154.5	477.5	184.8	183.6	193.3	561.7	197.9	210.6	164.9	573.4	1966.3	31.6	7.3	39	77.9	1	37.6	22.3	60.9	23.3	17.7909	12	53.0909	0.8	3	58.4	62.2	254.091	2.20243	1.27539	0.945183	1.08476	1.29223	68.4	0
2008	5	0	0	0	0	5	0	0	82.2	28.4	120.2	230.8	124.4	149.7	163.6	437.7	170.7	183.7	185.1	355.8	140.8	185.3	140	466.1	1490.4	0.4	11.5	5.1	17	13.9	22.1	28.3	64.3	52	17.0364	2.2	71.2364	17	39.2	94.8	151	303.536	0.736568	1.46904	2.00215	3.23965	2.03661	0	0
2009	5	0	0	0	0	5	0	0	115.4	68.1	169.5	353	74.6	154.7	178.1	407.4	157.2	196.5	209.8	563.5	173.9	155.7	178.3	507.9	1831.8	3	5.9	1.8	10.7	56.1	60.3	20.8	137.2	24.8	19.1758	16	59.9758	16.5	42.4	38.9	97.8	305.676	0.303116	3.3677	1.06434	1.92558	1.66872	20.3	42.3
2010	1	1	0	0	0	0	0	0	41.2	167.2	118	326.4	121.6	147.6	170.5	439.7	215.5	238.4	266	719.9	224.4	176.7	118.7	519.8	2005.8	36	2.3	36.9	75.2	13.4	38.8	93.7	145.9	5.7	24.1182	16.7	46.5182	9.8	14.8	62.5	87.1	354.718	2.30392	3.31817	0.646176	1.67564	1.76846	41.6	21.9
2011	6	0	0	0	0	0	6	0	37.8	108.6	133.5	279.9	196.4	176.6	188.2	561.2	241	225.7	265.2	731.9	184.7	174.3	190.5	549.5	2122.5	11.8	11.4	27.5	50.7	0	27	15.1	42.1	51.2	24.1879	44.5	119.888	7.9	41.4	22	71.3	283.988	1.81136	0.750178	1.63804	1.29754	1.33799	0	171.1
2012	2	0	2	0	0	0	0	0	77	144.9	152.4	374.3	141.3	179.4	168.2	488.9	217.7	182.9	239.3	639.9	184.2	176.6	175.1	535.9	2039	5	8	30.7	43.7	6.3	31.8	29.6	67.7	22	21.7545	13.1	56.8545	50.5	26.6	85.3	162.4	330.655	1.16751	1.38474	0.888491	3.03042	1.62165	0	20.2
2013	7	0	0	0	0	0	0	7	141.6	174	189.8	505.4	219.8	187.4	241.3	648.5	227.8	198.4	216.9	643.1	218.8	189.8	192	600.6	2397.6	2.7	58	19.6	80.3	12.2	24.5	19.1	55.8	39.5	19.7152	32.9	92.1152	23.2	39.7	30.7	93.6	321.815	1.58884	0.860447	1.43236	1.55844	1.34224	45.2	424.6
2014	1	1	0	0	0	0	0	0	40.2	164	195.8	400	201.4	141.6	146	489	192	228	273.3	693.3	247.4	192.9	165.2	605.5	2187.8	4.3	18.8	44.8	67.9	27.1	32.9	26.9	86.9	10.9	24.2606	3.1	38.2606	1	23.7	44.3	69	262.061	1.6975	1.7771	0.551862	1.13955	1.19783	216.3	157.9
2015	3	0	0	3	0	0	0	0	114.7	102.5	181	398.2	173	173.4	193.9	540.3	193.1	171.4	204.8	569.3	206	191.2	221.2	618.4	2126.2	12.7	11.7	30.5	54.9	1.1	2.5	20.8	24.4	37	18.5909	27.7	83.2909	8.8	13.8	12.7	35.3	197.891	1.3787	0.451601	1.46304	0.570828	0.930726	21.6	130.7
2016	7	0	0	0	0	0	0	7	179.8	157.5	198.4	535.7	160	166.8	204.4	531.2	180	192	236.4	608.4	196.9	169.6	198.5	565	2240.3	0	4.9	12.9	17.8	15	27.5	21.3	63.8	41.9	21.697	52.3	115.897	31	106.7	36.6	174.3	371.797	0.332276	1.20105	1.90495	3.08496	1.65959	102.8	305.3
2017	5	0	0	0	0	5	0	0	33.9	95.7	130.9	260.5	106.1	173.8	160.6	440.5	158.6	181.1	209.9	549.6	190.8	202.4	172	565.2	1815.8	0.3	3	3.6	6.9	28.7	46	44.6	119.3	92.1	18.5939	75.8	186.494	59.6	33.3	144.5	237.4	550.094	0.264875	2.70829	3.39327	4.20028	3.02949	0	40.8
2018	4	0	0	0	4	0	0	0	60.2	148.3	147.5	356	90.3	169.2	149.5	409	138.8	217.7	238.2	594.7	213.3	159.7	134.7	507.7	1867.4	18.7	8.2	0	26.9	0	9.2	0	9.2	0	20.8636	34	54.8636	4.3	22.1	16.5	42.9	133.864	0.755618	0.224939	0.922543	0.844987	0.716845	61.7	43.7
[truncated: 4 more columns]
