# Supplementary material for: Influence of Weather Conditions in the Northwestern Russian Federation on Flax Fiber Characters According to the Results of a 30-Year Study
Source: Plants (Basel). 2024 Mar 7;13(6):762. doi: 10.3390/plants13060762 (PMC10975659; doi:10.3390/plants13060762)
Supplement: Supplementary file 1 [file plants-13-00762-s001.zip › Table S2.xlsx]

## Sheet: TableS2
Table S2. Characteristics of fiber flax varieties Svetoch and Prizyv 81 by economically valuable traits, as well as by the sums of temperatures and precipitation during the growing seasons in 1987-2018
nzs	CV	nkw	nkw2	year	7Gr	gr1	gr2	gr3	gr4	gr5	gr6	gr7	Hp	Hs	Qo	Str	Flex	Fin	Qc	StPr	LFPr	TFPr	%LF	%TF	SePr	Se1000	s-g	g-f	f-m	g-m	s-m	sD	gD	fD	mD	s-mT	g-mT	s-gAT	g-fAT	f-mAT	s-mAT	s-gP	g-fP	f-mP	s-mP	g-mP	s-gHTC	g-fHTC	f-mHTC
Svetoch	Sv	5333	k5333	1987	2	0	2	0	0	0	0	0	99.0693	83.5986	12.9	20	43.0714	319.116	14.5556	582.143	98.2857	164.071	16.9214	27.9	54.2857	4.59286	6.64286	52.2857	44.9286	97.2143	103.857	43964	43970.6	44022.9	44067.9	1465.37	1366.76	98.6143	665.65	645.771	1410.04	9.83571	170.921	181.629	362.357	352.521	0.998633	2.56975	2.817
Prizyv	Pr	7472	k7472	1987	2	0	2	0	0	0	0	0	103	87.5	13.65	20.5	35	258.837	13.0649	795	135	237.5	17.05	29.7	61.5	4.425	7.5	50	46.5	96.5	104	43964	43971.5	44021.5	44068	1468	1358.5	109.5	631.55	670.65	1411.7	11.85	168.45	177.5	357.8	345.95	1.07366	2.66793	2.64802
Svetoch	Sv	5333	k5333	1988	6	0	0	0	0	0	6	0	95.6091	79.3636	15.7409	20.9318	54.1364	400.113	16.9015	600.909	104.955	129.318	17.3955	21.4455	109.395	4.67727	14.5	34.8636	28	62.8636	77.3636	43959	43973.5	44008.4	44036.4	1375.71	1195.93	135.582	582.532	619.6	1337.71	8.4	72.2	118.777	199.377	190.577	0.625772	1.24147	1.91602
Prizyv	Pr	7472	k7472	1988	6	0	0	0	0	0	6	0	96.44	82.47	14.39	16.95	51.8	508.707	17.2832	652	119.1	149.1	18.19	22.77	84.24	4.33	15.4	33.1	25.2	58.3	73.7	43959	43974.4	44007.5	44032.7	1304.18	1113.7	152.48	545.72	567.98	1266.18	8.8	71.8	73.92	154.52	145.72	0.584636	1.31634	1.29357
Svetoch	Sv	5333	k5333	1989	7	0	0	0	0	0	0	7	96.2222	70.2222	19.4556	11.2333	68.3333	329.568	15.4644	616.667	76.6667	119.444	12.2444	19.4333	134.111	5.02222	13.8889	36.6667	39.1111	75.7778	89.6667	43954	43967.9	44004.6	44043.7	1502.97	1344.44	136.522	568.944	760.256	1465.72	20.1222	35.6778	179.189	234.989	214.867	1.40569	0.62496	2.35757
Prizyv	Pr	7472	k7472	1989	7	0	0	0	0	0	0	7	91.375	67.625	18.75	11.475	67.375	331.518	15.4422	647.5	85.875	126.375	13.425	19.625	113.112	4.575	16.875	30.5	37.25	67.75	84.625	43954	43970.9	44001.4	44038.6	1406.64	1206.46	172.375	475.888	721.138	1369.4	25.7375	28.0625	155.85	209.65	183.037	1.46035	0.584379	2.16532
Svetoch	Sv	5333	k5333	1990	4	0	0	0	4	0	0	0	111.229	85.6286	20.5	17.775	52	265.604	14.3079	680	93.8714	144.143	13.6571	21.1	156.429	5.24286	20.4286	46.1429	38	84.1429	104.571	43944	43964.4	44010.6	44048.6	1437.4	1209.6	196.3	405.8	660.7	1262.8	0.2	57.5	87.1	144.8	144.6	0.0101885	1.41695	1.3183
Prizyv	Pr	7472	k7472	1990	4	0	0	0	4	0	0	0	109.111	83.9556	18.3333	14.7667	59.6667	289.575	14.7845	671.111	94	140	14.0667	20.7889	135	4.8	19.2222	45.4444	37.5556	83	102.222	43944	43963.2	44008.7	44046.2	1395.1	1174.9	196.3	367	657.2	1220.5	0.2	57.5	87.1	144.8	144.6	0.0101885	1.56676	1.32532
Svetoch	Sv	5333	k5333	1991	2	0	2	0	0	0	0	0	116.343	98.6714	18.5857	16.5714	51.7143	310.153	14.6177	847.857	163.429	187.286	19.0857	22.1143	111.571	4.94286	8.14286	46.1429	33.7143	79.8571	88	43965	43973.1	44019.3	44053	1415.33	1320.93	92.8	634.757	639.314	1366.87	19	88.8	60.8143	168.614	149.614	2.04741	1.39915	0.941506
Prizyv	Pr	7472	k7472	1991	2	0	2	0	0	0	0	0	108.4	95.15	18.4143	19.1143	51.1429	343.696	15.5052	960.714	226.429	258.286	23.2429	26.5714	111.357	4.59286	8.14286	43.7143	30.9286	74.6429	82.7857	43965	43973.1	44016.9	44047.8	1321.86	1260.44	92.8	584.657	595.95	1273.41	19	88.8	40.9714	149.629	130.629	2.04741	1.5193	0.687929
Svetoch	Sv	5333	k5333	1992	4	0	0	0	4	0	0	0	87.8	74.1	18.75	23.2333	63.3333	365.506	17.8316	750	128.667	178.5	17.3333	23.7667	174	5.56667	8	39.8333	38.1667	78	86	43964	43972	44011.8	44050	1439.05	1347.65	82.8	632.867	696.717	1412.38	5.7	24.4	52.1	82.2	76.5	0.688406	0.385594	0.749436
Prizyv	Pr	7472	k7472	1992	4	0	0	0	4	0	0	0	84.72	71.26	18.75	22.68	64.9	323.915	17.3369	724	140.2	166.5	19.49	23.16	122.6	5.01	8	38.4	36.1	74.5	82.5	43964	43972	44010.4	44046.5	1375	1283.6	82.8	598.36	659.84	1341	5.7	24.4	51.9	82	76.3	0.688406	0.408195	0.787319
Svetoch	Sv	5333	k5333	1994	2	0	2	0	0	0	0	0	93.15	80.1	16.75	24.4	58.5	406.033	18.1084	475	80.5	118	16.8	24.9	118.95	5.1	15	44	24.5	68.5	83.5	43962	43977	44021	44045.5	1281.1	1146.45	46.7	584.95	522.45	1154.1	24.85	91.85	48.9	165.6	140.75	5.37212	1.57173	0.944714
Prizyv	Pr	7472	k7472	1994	2	0	2	0	0	0	0	0	98.4	82.7667	17.6	20.2	62	289.855	16.1081	706.667	136.667	179.333	19.3	25.1333	117.233	4.6	16.6667	39.6667	25.6667	65.3333	82	43962	43978.7	44018.3	44044	1249.83	1099.63	49.0667	535.633	538.133	1122.83	25.6	91.1	48.9	165.6	140	5.26047	1.70085	0.910514
Svetoch	Sv	5333	k5333	1995	3	0	0	3	0	0	0	0	104.5	89.5	18.25	15.95	63.5	493.032	18.0494	372	58.5	104	15.8	28.1	94.75	5.25	5.5	36	39.5	75.5	81	43975	43980.5	44016.5	44056	1439.1	1339.45	99.65	665.8	663.875	1429.32	1.05	95.8	68.75	165.5	164.45	0.102725	1.43818	1.0344
Prizyv	Pr	7472	k7472	1995	3	0	0	3	0	0	0	0	99	86	17.2	18.275	63.25	455.023	17.9953	459	78.25	126.562	17.05	27.6	102.475	4.4125	4.25	34.75	35.5	70.25	74.5	43975	43979.2	44014	44049.5	1339.03	1263.5	75.525	670.1	583.6	1329.23	0.7	63.825	85.425	149.95	149.25	0.09351	0.932499	1.47076
Svetoch	Sv	5333	k5333	1996	3	0	0	3	0	0	0	0	91	79.3364	19.3091	23.9545	65.6364	525.646	20.2879	658.182	116.273	166.909	17.9364	25.2727	108.655	5.32727	10.9091	44.8182	39.5455	84.3636	95.2727	43965	43975.9	44020.7	44060.3	1415.05	1325.44	48.1182	638.373	657.355	1343.85	12.5	125.073	83.2818	220.855	208.355	2.61855	1.96086	1.26794
Prizyv	Pr	7472	k7472	1996	3	0	0	3	0	0	0	0	88.4909	78.4909	19.7273	22.3909	64.2727	454.382	18.9124	689.091	132.091	180.273	19.3	26.2	93.8636	4.59091	10.9091	43.4545	36.9091	80.3636	91.2727	43965	43975.9	44019.4	44056.3	1338.22	1246.69	50.0273	613.473	605.418	1268.92	12.5	124.855	83.0455	220.4	207.9	2.51979	2.03595	1.37333
Svetoch	Sv	5333	k5333	1997	4	0	0	0	4	0	0	0	101	83.14	15.36	21.48	49	372.706	16.1412	486	68.4	99.2	14.12	20.88	140.74	5.28	17.2	34	33.6	67.6	84.8	43965	43982.2	44016.2	44049.8	1375.58	1225.2	89.78	559.3	646.5	1295.58	28.7	39.7	44.3	112.7	84	3.31352	0.710291	0.686338
Prizyv	Pr	7472	k7472	1997	4	0	0	0	4	0	0	0	97.375	78	16.5	20.575	47.25	362.906	15.6578	549	80	114.3	14.3367	21.0483	122.837	4.7875	16.875	32	31.75	63.75	80.625	43965	43981.9	44013.9	44045.6	1294.69	1148.44	85.65	510.062	618.975	1214.69	28.7	39.7	44.3	112.7	84	3.56259	0.780072	0.716503
Svetoch	Sv	5333	k5333	1998	2	0	2	0	0	0	0	0	100.025	84.25	15.2	18.8	57.25	449.081	17.4231	387.5	52.5	91.25	13.975	23.6	76.3	4.875	11.25	40.25	42.75	83	94.25	43964	43975.2	44015.5	44058.2	1498	1363.62	97.675	580.875	738.2	1416.75	8.75	123.525	170.55	302.825	294.075	0.760053	2.11909	2.30849
Prizyv	Pr	7472	k7472	1998	2	0	2	0	0	0	0	0	99.325	80.925	16.95	20.225	53.75	495.6	17.9628	340	57.75	89	17.075	26.15	87.75	4.475	14.25	34.75	32.5	67.25	81.5	43964	43978.2	44013	44045.5	1312.38	1147.03	116.1	515.8	586	1217.9	13.125	126.575	113.4	258.75	245.625	1.05056	2.45579	1.93515
Svetoch	Sv	5333	k5333	1999	6	0	0	0	0	0	6	0	86	73.75	14.925	25.525	67.5	493.617	20.372	540	110.75	152.25	20.65	28.55	122.825	4.7	10	33	25	58	68	43968	43978	44011	44036	1315.05	1187.08	111.775	630.45	549.075	1291.3	14.25	49.725	19.65	83.625	69.375	1.23063	0.789074	0.357952
Prizyv	Pr	7472	k7472	1999	6	0	0	0	0	0	6	0	86	75	14.3857	24.9857	58.8571	511.745	19.6355	602.857	135.214	175.571	22.7857	29.2857	120.329	4.25714	10.2857	31	25.2857	56.2857	66.5714	43968	43978.3	44009.3	44034.6	1287.26	1154.66	116.4	585.771	562.557	1264.73	13.8571	49.2714	14.3143	77.4429	63.5857	1.14873	0.844338	0.253173
Svetoch	Sv	5333	k5333	2000	4	0	0	0	4	0	0	0	94	74.5	13.2	22.05	68	499.602	19.8048	155	25.65	38	16.45	24.7	35.95	4.4	14	39.5	32.5	72	86	43962	43976	44015.5	44048	1446	1252.85	174.75	517	713.95	1405.7	36.25	46.85	53.4	136.5	100.25	2.08719	0.90627	0.748019
Prizyv	Pr	7472	k7472	2000	4	0	0	0	4	0	0	0	90.6667	76.3333	14.0333	22.2	63.3333	494.901	19.307	326.667	53.6667	87.3333	15.9667	27.2	42.1667	4.23333	11	39.6667	31.3333	71	82	43962	43973	44012.7	44044	1359.77	1210.7	130.667	509.533	679.267	1319.47	35.1667	45.9667	50.9667	132.1	96.9333	2.75605	0.903552	0.750608
Svetoch	Sv	5333	k5333	2001	2	0	2	0	0	0	0	0	100.757	83.3714	16.0429	21.8143	65.4286	370.636	17.824	637.143	115.714	134.571	18.0143	21.1	122.957	4.81429	13.2857	43.7143	27.8571	71.5714	84.8571	43958	43971.3	44015	44042.9	1361.73	1221.11	99.0714	505.629	623.729	1228.43	8.77157	91.8571	80.8143	181.443	172.671	0.752202	1.81974	1.29512
Prizyv	Pr	7472	k7472	2001	2	0	2	0	0	0	0	0	99.9556	83.5222	16.5889	19.9444	71.4444	364.142	17.9672	594.444	116	142.556	19.8778	24.3567	105.1	4.43333	15.2222	40.8889	23.5556	64.4444	79.6667	43958	43973.2	44014.1	44037.7	1257.89	1102.99	104.844	480.989	538.756	1124.59	12.9222	85	77.7556	175.678	162.756	1.1088	1.76061	1.44463
Svetoch	Sv	5333	k5333	2002	4	0	0	0	4	0	0	0	99.4	88.7	17.93	22.67	66.3	416.955	18.6844	874	168.9	240.7	19.36	27.784	106.74	5.26	6.8	46.8	33.4	80.2	87	43949	43955.8	44002.6	44036	1412.41	1320.31	86	608.64	656.87	1351.51	5.3	57.66	68.18	131.11	125.81	0.632711	0.948117	1.03645
Prizyv	Pr	7472	k7472	2002	4	0	0	0	4	0	0	0	95.8	84.7	18.13	22.1	63.4	433.255	18.4923	1018	199.3	286.9	19.56	28.3	106.14	4.82	6.8	45.7	30.9	76.6	83.4	43949	43955.8	44001.5	44032.4	1338.36	1246.26	86	587.47	603.99	1277.46	5.3	57.63	43.78	106.71	101.41	0.632711	0.982982	0.714673
Svetoch	Sv	5333	k5333	2004	2	0	2	0	0	0	0	0	109.8	93.2	17	18.12	76.6	461.993	19.3899	768	159	210	20.4	26.86	119.2	5.2	15.8	46.2	35.4	81.6	97.4	43949	43964.8	44011	44046.4	1418.82	1268.22	96.58	516.7	672.56	1285.84	9	120.44	164.68	294.12	285.12	0.693598	2.33757	2.45187
Prizyv	Pr	7472	k7472	2004	2	0	2	0	0	0	0	0	106.8	90.8	17.06	18.18	76.6	486.898	19.7257	772	172.4	222.4	22.24	28.64	72.4	4.6	16	45	32.4	77.4	93.4	43949	43965	44010	44042.4	1332.6	1178.02	100.56	494.14	605.1	1199.8	9	118.62	158.46	286.04	277.04	0.677116	2.41542	2.62013
Svetoch	Sv	5333	k5333	2005	2	0	2	0	0	0	0	0	103.4	92.4	19.3	27.78	73.8	335.881	19.4025	554	108.88	140.32	19.74	25.8	116.8	5.28	11	41.4	34.2	75.6	86.6	43956	43967	44008.4	44042.6	1429.52	1329.22	25.3	631.22	689	1345.52	39	113.62	104.16	256.78	217.78	15.415	1.79858	1.51188
Prizyv	Pr	7472	k7472	2005	2	0	2	0	0	0	0	0	98.6	88.6	19.36	29.02	70.4	310.919	18.9859	684	147.8	184.8	21.86	27.584	84	4.72	11	40	31	71	82	43956	43967	44007	44038	1341.44	1241.14	25.3	605.9	626.28	1257.48	39	92.5	116.98	248.6	209.6	15.415	1.52665	1.86808
Svetoch	Sv	5333	k5333	2006	4	0	0	0	4	0	0	0	94	82.5	21.9	29.275	58.125	300.045	17.6681	730	120.663	196.002	16.4	26.7	152.5	5.25	21.25	39.5	29.75	69.25	90.5	43955	43976.2	44015.8	44045.5	1527.67	1254.6	239.975	637.025	590.875	1467.88	26.8	82.6	41.175	150.275	123.475	1.11685	1.29693	0.696412
Prizyv	Pr	7472	k7472	2006	4	0	0	0	4	0	0	0	90.75	80.75	22.075	29.65	62.35	290.554	18.0422	725	143.89	201.523	19.85	28.075	109.75	4.575	21	37	27.75	64.75	85.75	43955	43976	44013	44040.8	1453.07	1183.07	236.9	587.475	568.9	1393.28	26.5	81.175	36.825	144.5	118	1.11862	1.38397	0.647594
Svetoch	Sv	5333	k5333	2007	3	0	0	3	0	0	0	0	98.5	85.7222	24.5267	29.9667	58.6667	304.5	17.9185	726.667	111.009	155.857	14.9395	21.4667	140	5.6	9	41.1667	39.8333	81	90	43958	43967	44008.2	44048	1493.95	1391.95	84.5	662.617	729.367	1476.48	36.6	86.3333	65.9333	188.867	152.267	4.33136	1.30198	0.905227
Prizyv	Pr	7472	k7472	2007	3	0	0	3	0	0	0	0	99	86.2778	24.21	31.5667	55.6167	285.833	17.6908	776.667	138.846	184.947	18.0394	23.9667	115.833	4.8	9	38.8333	34.3333	73.1667	82.1667	43958	43967	44005.8	44040.2	1357.03	1255.03	84.5	626.55	628.483	1339.53	36.6	80.8833	60.9167	178.4	141.8	4.33136	1.29217	0.970015
Svetoch	Sv	5333	k5333	2008	5	0	0	0	0	5	0	0	101.444	85.1111	19.38	18.2833	58.1667	255.333	14.8927	875	89.2688	190.943	10.3285	21.75	238.833	5.46667	6.83333	53.5	42.5	96	102.833	43951	43957.8	44011.3	44053.8	1481.85	1394.25	84	569.7	724.55	1378.25	0.2	73.0833	84.7833	157.917	157.717	0.0238095	1.28177	1.16893
Prizyv	Pr	7472	k7472	2008	5	0	0	0	0	5	0	0	102.444	86.3333	18.7833	17.7	57	242.667	14.4947	995	136.189	224.607	13.9705	22.5167	186.667	4.8	6.83333	50.5	40	90.5	97.3333	43951	43957.8	44008.3	44048.3	1394.73	1306.22	84	522.483	687.4	1293.88	0.133333	68.9333	85.3667	154.3	154.167	0.015873	1.32218	1.24278
Svetoch	Sv	5333	k5333	2009	5	0	0	0	0	5	0	0	102.95	88.45	21.3	29.36	45.2	291	16.275	614	106.616	139.648	17.4108	22.78	156.4	5.36	11.4	45.2	34.6	79.8	91.2	43955	43966.4	44011.6	44046.2	1427.94	1303.36	109.2	600.96	644.7	1354.86	6.38	141.52	71.02	218.92	212.54	0.585845	2.3555	1.10173
Prizyv	Pr	7472	k7472	2009	5	0	0	0	0	5	0	0	99.2847	83.6806	21	32.4833	41.6667	227.222	15.7172	665	131.766	164.257	19.4072	24.4	140.833	4.4	11.1667	45.1667	36.1667	81.3333	92.5	43955	43966.2	44011.3	44047.5	1445.8	1318.15	111.067	593.4	668.233	1372.7	6.13333	134.967	73.6	214.7	207.15	0.553543	2.27218	1.11601
Svetoch	Sv	5333	k5333	2010	1	1	0	0	0	0	0	0	101	87.7778	21.5833	29.95	64.3333	253.444	17.8181	753.333	142.059	177.787	19.4935	23.6	115.5	4.74167	11.1667	45	25.6667	70.6667	81.8333	43949	43960.2	44005.2	44030.8	1298.97	1209.22	35.35	600.117	565.533	1201	21.7	143.9	74.1	239.7	218	6.20047	2.39783	1.31174
Prizyv	Pr	7472	k7472	2010	1	1	0	0	0	0	0	0	97.2222	85.1111	20.1667	28.3333	55	222.222	16.1556	766.667	150.821	190.133	19.873	24.8	87.1667	4.6	11	43.1667	25.5	68.6667	79.6667	43949	43960	44003.2	44028.7	1251.17	1255.15	32.8	572.9	547.567	1153.27	20.9	111.967	106.833	239.7	218.8	6.37195	1.95408	1.95441
Svetoch	Sv	5333	k5333	2011	6	0	0	0	0	0	6	0	94.3958	81.8646	18.375	24.0375	56.125	307.917	16.5229	659.375	98.6706	145.251	14.7796	21.9375	98.75	5.1	10	36.875	27.75	64.625	74.625	43961	43971	44007.9	44035.6	1400.54	1280.95	109.787	616.9	662.525	1389.21	8.8875	65.2375	60.8125	136.025	127.138	0.783435	1.05702	0.920454
Prizyv	Pr	7472	k7472	2011	6	0	0	0	0	0	6	0	92.5885	80.5078	18.125	24.1125	53.375	291.792	16.0533	695.625	117.253	166.207	16.938	23.925	100.375	4.6	10.125	34.5	27	61.5	71.625	43961	43971.1	44005.6	44032.6	1330.38	1208.38	112.2	572.888	624.975	1310.06	8.05	63.8125	62.5375	134.725	126.675	0.686515	1.11513	1.00163
Svetoch	Sv	5333	k5333	2012	2	0	2	0	0	0	0	0	97.7619	85.8571	18.4286	23.7286	46.8571	289.762	15.2983	746.429	114.079	157.498	15.5009	21.2286	156.571	5.48571	9.71429	41.7143	39.1429	80.8571	90.5714	43955	43964.7	44006.4	44045.6	1565.99	1448.83	90.7571	646.714	793.943	1531.41	11.7	77.5857	73.2429	162.529	150.829	1.30215	1.19849	0.918473
Prizyv	Pr	7472	k7472	2012	2	0	2	0	0	0	0	0	97.1905	84.9524	18.4286	21.4	52.5714	304.333	15.5935	804.286	141.648	191.066	17.4908	23.8714	111.571	4.8	9.71429	41.1429	35.1429	76.2857	86	43955	43964.7	44005.9	44041	1464.4	1347.24	90.7571	637.429	701.643	1429.83	11.7	73.2429	65.9571	150.9	139.2	1.30215	1.14874	0.939436
Svetoch	Sv	5333	k5333	2013	7	0	0	0	0	0	0	7	91.8667	81.4667	23.2	23.9	55.6	287.867	16.1823	715	95.0827	138.87	13.205	19.32	192.8	5.12	8	38.4	30.2	68.6	76.6	43957	43965	44003.4	44033.6	1545.02	1416.82	124.6	732.58	687.96	1545.14	14.6	102.4	89.36	206.72	190.52	1.17175	1.39906	1.29671
Prizyv	Pr	7472	k7472	2013	7	0	0	0	0	0	0	7	96.4	85.4667	25.2	29.02	53.6	333.667	17.6017	837	152.829	193.201	18.1187	22.98	141.8	4.44	7.8	34.8	28.4	63.2	71	43957	43964.8	43999.6	44028	1448.9	1327.86	121.04	660.74	667.16	1448.94	13.58	101.06	56.56	171.2	157.62	1.1153	1.52886	0.847376
Svetoch	Sv	5333	k5333	2014	1	1	0	0	0	0	0	0	85.9444	74.3889	22.3333	22.4167	55.6667	287.444	15.8868	424.167	64.2831	84.6108	15.0839	19.9167	114.667	5.16667	19.5	37.1667	38.6667	75.8333	95.3333	43944	43963.5	44000.7	44039.3	1670.6	1455.1	162.5	652.2	774.7	1589.4	12.0833	98.9667	63.85	174.9	162.817	0.721098	1.51671	0.825405
Prizyv	Pr	7472	k7472	2014	1	1	0	0	0	0	0	0	88.7778	75.7222	25	24.55	59.8333	299.111	16.8818	517.5	100.423	122.477	19.4578	23.95	85.3333	4.33333	19.3333	36.1667	35.8333	72	91.3333	43944	43963.3	43999.5	44035.3	1569.75	1356.52	160.233	647.267	681.05	1488.55	10.8833	92.0167	72	174.9	164.017	0.656689	1.4202	1.05932
Svetoch	Sv	5333	k5333	2015	3	0	0	3	0	0	0	0	92.1333	80.1333	18.6	25.6	50.6	279.733	15.9165	674	110.07	149.824	16.0336	22.4	184.2	5.44	8	43.8	40.2	84	92	43956	43964	44007.8	44048	1597.6	1475.7	121.9	694.7	763.92	1580.52	8.5	66.3	117.86	192.66	184.16	0.697293	0.954698	1.54313
Prizyv	Pr	7472	k7472	2015	3	0	0	3	0	0	0	0	96.6667	83.4	18.6	28.56	50.4	231.533	15.8619	801	151.785	178.007	18.878	22.36	126	4.56	8.4	41.8	32.8	74.6	83	43956	43964.4	44006.2	44039	1431.3	1304.3	127	660.26	626.98	1414.24	9.58	61.06	105.26	175.7	166.12	0.746437	0.923292	1.67733
Svetoch	Sv	5333	k5333	2016	7	0	0	0	0	0	0	7	94.5	81.3333	23	20.625	63.25	330.917	16.8519	455	46.6142	106.925	9.93834	23.5	68.75	4.85	17.5	38.5	39.5	78	95.5	43958	43975.5	44014	44053.5	1785.33	1485.92	299.4	695.6	785.95	1780.95	14.65	68.475	213.875	295.925	281.275	0.488798	0.98636	2.71813
Prizyv	Pr	7472	k7472	2016	7	0	0	0	0	0	0	7	100.833	85	23.5	23.975	56.75	284	16.262	550	79.9309	137.5	14.4167	25	37.75	4	15.75	38.5	35.25	73.75	89.5	43958	43973.8	44012.2	44047.5	1674.8	1404.17	270.625	686.9	713.5	1671.03	11.225	68.7	189.65	268.4	257.175	0.370368	1.0008	2.65764
Svetoch	Sv	5333	k5333	2017	5	0	0	0	0	5	0	0	103.533	90.1333	18	24.7	40.6	265.267	14.5485	672	113.688	154.955	16.9102	22.96	194	5.64	12.6	43	43.8	86.8	99.4	43962	43974.6	44017.6	44061.4	1625.06	1476.34	125.72	616.9	831.22	1573.84	3.58	138.42	253.78	395.78	392.2	0.310842	2.26269	3.04615
Prizyv	Pr	7472	k7472	2017	5	0	0	0	0	5	0	0	113.133	97.5333	18.8	26.06	37.2	210.533	13.7689	776	148.162	179.654	19.3604	23.48	151	4.88	8.8	42.4	39	81.4	90.2	43962	43970.8	44013.2	44052.2	1444.14	1345.84	78.88	591.88	722.16	1392.92	2.76	121.1	230.46	354.32	351.56	0.421771	2.0163	3.19394
Svetoch	Sv	5333	k5333	2018	4	0	0	0	4	0	0	0	74	62.5556	17.1667	21.4167	50.6667	282.5	15.1225	275	35.4933	64.625	12.9333	23.5	75.8333	4.73333	6.33333	43	33.6667	76.6667	83	43959	43965.3	44008.3	44042	1375	1283.33	91.6667	636.167	647.5	1375.33	0	17.4	77.1	94.5	94.5	0	0.273898	1.19221
Prizyv	Pr	7472	k7472	2018	4	0	0	0	4	0	0	0	81.5556	68.2222	17.8333	27.7833	49.6667	289.5	16.3868	349.167	51.895	86.9425	14.8167	24.9	63.6667	4	6.66667	41.1667	29.1667	70.3333	77	43959	43965.7	44006.8	44036	1241	1143	98.5	604.5	538.5	1241.5	1.36667	16.0333	77.1	94.5	93.1333	0.108466	0.264169	1.43398
[truncated: 46 more columns]
