# Supplementary material for: Influence of Weather Conditions in the Northwestern Russian Federation on Flax Fiber Characters According to the Results of a 30-Year Study
Source: Plants (Basel). 2024 Mar 7;13(6):762. doi: 10.3390/plants13060762 (PMC10975659; doi:10.3390/plants13060762)
Supplement: Supplementary file 1 [file plants-13-00762-s001.zip › Table S3.xlsx]

## Sheet: TableS3
Table S3. Initial and z-transformed correlations between the economically valuable flax characters
		r	r	z	z
		Svetoch	Prizyv 81	Svetoch	Prizyv 81
Hs	Hp	0.88	0.87	1.37577	1.33308
s-g		0.1	0.03	0.100335	0.030009
g-f		0.36	0.45	0.376886	0.4847
f-m		0.17	0.29	0.171667	0.298566
g-m		0.31	0.44	0.320545	0.472231
s-m		0.37	0.46	0.388423	0.497311
%LF		0.21	0.05	0.213171	0.0500417
%TF		0	-0.05	0	-0.0500417
Qo		0.01	-0.03	0.0100003	-0.030009
Str		-0.24	-0.22	-0.244774	-0.223656
Flex		-0.01	-0.23	-0.0100003	-0.234189
Fin		-0.06	-0.22	-0.0600722	-0.223656
Qc		-0.16	-0.42	-0.161387	-0.447692
StrPr		0.42	0.39	0.447692	0.4118
LFPr		0.43	0.33	0.459897	0.342828
TFPr		0.39	0.35	0.4118	0.365444
SePr		0.13	0.25	0.13074	0.255413
Se1000		0.19	0.32	0.192337	0.331647
s-mT		-0.07	0.14	-0.0701147	0.140926
g-mT		-0.06	0.19	-0.0600722	0.192337
s-mP		0.36	0.57	0.376886	0.647523
g-mP		0.35	0.59	0.365444	0.677666
s-gAT		-0.08	-0.03	-0.0801713	-0.030009
s-gP		0.04	-0.12	0.0400214	-0.120581
g-fAT		-0.4	-0.24	-0.423649	-0.244774
g-fP		0.41	0.49	0.435611	0.53606
f-mAT		0.02	0.23	0.0200027	0.234189
f-mP		0.22	0.5	0.223656	0.549306
g-mAT		-0.22	-0.05	-0.223656	-0.0500417
s-gHTC		0.14	0.02	0.140926	0.0200027
g-fHTC		0.51	0.58	0.56273	0.662463
f-mHTC		0.24	0.49	0.244774	0.53606
s-mHTC		0.44	0.59	0.472231	0.677666
s-g	Hs	-0.06	-0.2	-0.0600722	-0.202733
g-f		0.38	0.48	0.40006	0.522984
f-m		0.11	0.14	0.110447	0.140926
g-m		0.29	0.37	0.298566	0.388423
s-m		0.26	0.27	0.266108	0.276864
%LF		0.36	0.37	0.376886	0.388423
%TF		0.16	0.24	0.161387	0.244774
Qo		0.13	0.08	0.13074	0.0801713
Str		0.08	0.1	0.0801713	0.100335
Flex		-0.04	-0.23	-0.0400214	-0.234189
Fin		-0.08	-0.2	-0.0801713	-0.202733
Qc		-0.03	-0.21	-0.030009	-0.213171
StrPr		0.51	0.53	0.56273	0.590145
LFPr		0.57	0.58	0.647523	0.662463
TFPr		0.53	0.58	0.590145	0.662463
SePr		0.17	0.19	0.171667	0.192337
Se1000		0.32	0.3	0.331647	0.30952
s-mT		-0.01	0.13	-0.0100003	0.13074
g-mT		0.08	0.32	0.0801713	0.331647
s-mP		0.39	0.53	0.4118	0.590145
g-mP		0.38	0.54	0.40006	0.604156
s-gAT		-0.2	-0.21	-0.202733	-0.213171
s-gP		0.06	-0.07	0.0600722	-0.0701147
g-fAT		-0.07	0.13	-0.0701147	0.13074
g-fP		0.57	0.6	0.647523	0.693147
f-mAT		0	0.09	0	0.0902442
f-mP		0.14	0.35	0.140926	0.365444
g-mAT		-0.12	0.02	-0.120581	0.0200027
s-gHTC		0.26	0.15	0.266108	0.15114
g-fHTC		0.6	0.59	0.693147	0.677666
f-mHTC		0.16	0.35	0.161387	0.365444
s-mHTC		0.45	0.54	0.4847	0.604156
g-f	s-g	-0.28	-0.3	-0.287682	-0.30952
f-m		-0.18	-0.2	-0.181983	-0.202733
g-m		-0.28	-0.29	-0.287682	-0.298566
s-m		0.22	0.21	0.223656	0.213171
%LF		-0.11	-0.09	-0.110447	-0.0902442
%TF		-0.2	-0.22	-0.202733	-0.223656
Qo		0.16	0.13	0.161387	0.13074
Str		0.01	-0.23	0.0100003	-0.234189
Flex		0.08	0.3	0.0801713	0.30952
Fin		-0.03	0.06	-0.030009	0.0600722
Qc		0.02	0.07	0.0200027	0.0701147
StrPr		-0.17	-0.27	-0.171667	-0.276864
LFPr		-0.16	-0.25	-0.161387	-0.255413
TFPr		-0.2	-0.31	-0.202733	-0.320545
SePr		-0.05	-0.16	-0.0500417	-0.161387
Se1000		-0.07	-0.09	-0.0701147	-0.0902442
s-mT		0.2	0.16	0.202733	0.161387
g-mT		-0.25	-0.37	-0.255413	-0.388423
s-mP		0.06	0.06	0.0600722	0.0600722
g-mP		0.03	0.02	0.030009	0.0200027
s-gAT		0.58	0.55	0.662463	0.618381
s-gP		0.27	0.28	0.276864	0.287682
g-fAT		-0.45	-0.49	-0.4847	-0.53606
g-fP		-0.05	0	-0.0500417	0
f-mAT		-0.02	-0.05	-0.0200027	-0.0500417
f-mP		0.07	0.03	0.0701147	0.030009
g-mAT		0.01	-0.06	0.0100003	-0.0600722
s-gHTC		0.01	0.03	0.0100003	0.030009
g-fHTC		0.06	0.15	0.0600722	0.15114
f-mHTC		0.06	0.03	0.0600722	0.030009
s-mHTC		0.06	0.09	0.0600722	0.0902442
f-m	g-f	0.33	0.45	0.342828	0.4847
g-m		0.78	0.85	1.04537	1.25615
s-m		0.65	0.72	0.775299	0.907645
%LF		0.08	0.08	0.0801713	0.0801713
%TF		0.15	0.22	0.15114	0.223656
Qo		-0.02	-0.05	-0.0200027	-0.0500417
Str		-0.02	0.04	-0.0200027	0.0400214
Flex		-0.17	-0.16	-0.171667	-0.161387
Fin		-0.29	-0.38	-0.298566	-0.40006
Qc		-0.27	-0.34	-0.276864	-0.354093
StrPr		0.44	0.5	0.472231	0.549306
LFPr		0.36	0.41	0.376886	0.435611
TFPr		0.48	0.55	0.522984	0.618381
SePr		0.17	0.11	0.171667	0.110447
Se1000		0.14	0.23	0.140926	0.234189
s-mT		-0.07	0.08	-0.0701147	0.0801713
g-mT		0.11	0.33	0.110447	0.342828
s-mP		0.3	0.34	0.30952	0.354093
g-mP		0.33	0.38	0.342828	0.40006
s-gAT		-0.27	-0.24	-0.276864	-0.244774
s-gP		-0.27	-0.3	-0.276864	-0.30952
g-fAT		-0.17	-0.05	-0.171667	-0.0500417
g-fP		0.42	0.43	0.447692	0.459897
f-mAT		-0.02	0.13	-0.0200027	0.13074
f-mP		0.18	0.25	0.181983	0.255413
g-mAT		-0.22	-0.08	-0.223656	-0.0801713
s-gHTC		-0.02	-0.03	-0.0200027	-0.030009
g-fHTC		0.47	0.46	0.51007	0.497311
f-mHTC		0.24	0.27	0.244774	0.276864
s-mHTC		0.38	0.36	0.40006	0.376886
g-m	f-m	0.85	0.85	1.25615	1.25615
s-m		0.77	0.77	1.02033	1.02033
%LF		-0.4	-0.37	-0.423649	-0.388423
%TF		-0.07	-0.09	-0.0701147	-0.0902442
Qo		0.08	0.07	0.0801713	0.0701147
Str		-0.34	-0.2	-0.354093	-0.202733
Flex		-0.29	-0.33	-0.298566	-0.342828
Fin		-0.15	-0.3	-0.15114	-0.30952
Qc		-0.4	-0.51	-0.423649	-0.56273
StrPr		0.03	0.15	0.030009	0.15114
LFPr		-0.18	-0.07	-0.181983	-0.0701147
TFPr		0	0.1	0	0.100335
SePr		0.13	0.12	0.13074	0.120581
Se1000		0.4	0.24	0.423649	0.244774
s-mT		0.62	0.55	0.725005	0.618381
g-mT		0.75	0.64	0.972955	0.758174
s-mP		0.46	0.46	0.497311	0.497311
g-mP		0.5	0.49	0.549306	0.53606
s-gAT		0.11	0.07	0.110447	0.0701147
s-gP		-0.29	-0.26	-0.298566	-0.266108
g-fAT		0.15	0.12	0.15114	0.120581
g-fP		0.19	0.26	0.192337	0.266108
f-mAT		0.76	0.72	0.996215	0.907645
f-mP		0.56	0.52	0.632833	0.57634
g-mAT		0.55	0.46	0.618381	0.497311
s-gHTC		-0.23	-0.22	-0.234189	-0.223656
g-fHTC		0.15	0.2	0.15114	0.202733
f-mHTC		0.49	0.43	0.53606	0.459897
s-mHTC		0.33	0.33	0.342828	0.342828
s-m	g-m	0.87	0.87	1.33308	1.33308
%LF		-0.22	-0.17	-0.223656	-0.171667
%TF		0.04	0.08	0.0400214	0.0801713
Qo		0.04	0.01	0.0400214	0.0100003
Str		-0.24	-0.09	-0.244774	-0.0902442
Flex		-0.29	-0.29	-0.298566	-0.298566
Fin		-0.26	-0.4	-0.266108	-0.423649
Qc		-0.41	-0.5	-0.435611	-0.549306
StrPr		0.26	0.38	0.266108	0.40006
LFPr		0.08	0.2	0.0801713	0.202733
TFPr		0.27	0.38	0.276864	0.40006
SePr		0.18	0.13	0.181983	0.13074
Se1000		0.34	0.28	0.354093	0.287682
s-mT		0.37	0.37	0.388423	0.388423
g-mT		0.56	0.57	0.632833	0.647523
s-mP		0.47	0.47	0.51007	0.51007
g-mP		0.52	0.51	0.57634	0.56273
s-gAT		-0.08	-0.1	-0.0801713	-0.100335
s-gP		-0.34	-0.33	-0.354093	-0.342828
g-fAT		0	0.04	0	0.0400214
g-fP		0.37	0.41	0.388423	0.435611
f-mAT		0.49	0.5	0.53606	0.549306
f-mP		0.48	0.46	0.522984	0.497311
g-mAT		0.24	0.22	0.244774	0.223656
s-gHTC		-0.16	-0.14	-0.161387	-0.140926
g-fHTC		0.36	0.39	0.376886	0.4118
f-mHTC		0.46	0.41	0.497311	0.435611
s-mHTC		0.43	0.41	0.459897	0.435611
%LF	s-m	-0.28	-0.22	-0.287682	-0.223656
%TF		-0.06	-0.04	-0.0600722	-0.0400214
Qo		0.12	0.08	0.120581	0.0801713
Str		-0.23	-0.21	-0.234189	-0.213171
Flex		-0.25	-0.14	-0.255413	-0.140926
Fin		-0.28	-0.38	-0.287682	-0.40006
Qc		-0.41	-0.47	-0.435611	-0.51007
StrPr		0.18	0.25	0.181983	0.255413
LFPr		0	0.07	0	0.0701147
TFPr		0.18	0.23	0.181983	0.234189
SePr		0.16	0.06	0.161387	0.0600722
Se1000		0.31	0.24	0.320545	0.244774
s-mT		0.48	0.46	0.522984	0.497311
g-mT		0.44	0.4	0.472231	0.423649
s-mP		0.51	0.51	0.56273	0.56273
g-mP		0.54	0.54	0.604156	0.604156
s-gAT		0.21	0.18	0.213171	0.181983
s-gP		-0.21	-0.2	-0.213171	-0.202733
g-fAT		-0.23	-0.21	-0.234189	-0.213171
g-fP		0.34	0.42	0.354093	0.447692
f-mAT		0.49	0.48	0.53606	0.522984
f-mP		0.52	0.48	0.57634	0.522984
g-mAT		0.25	0.19	0.255413	0.192337
s-gHTC		-0.16	-0.13	-0.161387	-0.13074
g-fHTC		0.4	0.47	0.423649	0.51007
f-mHTC		0.5	0.44	0.549306	0.472231
s-mHTC		0.47	0.46	0.51007	0.497311
%TF	%LF	0.53	0.56	0.590145	0.632833
Qo		-0.3	0.01	-0.30952	0.0100003
Str		0.35	0.34	0.365444	0.354093
Flex		0.28	0.2	0.287682	0.202733
Fin		0.38	0.18	0.40006	0.181983
Qc		0.54	0.44	0.604156	0.472231
StrPr		0.22	0.31	0.223656	0.320545
LFPr		0.66	0.7	0.792814	0.867301
TFPr		0.42	0.5	0.447692	0.549306
SePr		-0.16	0	-0.161387	0
Se1000		-0.08	0.12	-0.0801713	0.120581
s-mT		-0.52	-0.23	-0.57634	-0.234189
g-mT		-0.41	-0.05	-0.435611	-0.0500417
s-mP		0.01	0.07	0.0100003	0.0701147
g-mP		-0.01	0.05	-0.0100003	0.0500417
s-gAT		-0.46	-0.36	-0.497311	-0.376886
s-gP		0.17	0.14	0.171667	0.140926
g-fAT		-0.08	0.23	-0.0801713	0.234189
g-fP		0.33	0.37	0.342828	0.388423
f-mAT		-0.48	-0.4	-0.522984	-0.423649
f-mP		-0.24	-0.19	-0.244774	-0.192337
g-mAT		-0.51	-0.23	-0.56273	-0.234189
s-gHTC		0.34	0.3	0.354093	0.30952
g-fHTC		0.37	0.33	0.388423	0.342828
f-mHTC		-0.17	-0.14	-0.171667	-0.140926
s-mHTC		0.16	0.15	0.161387	0.15114
Qo	%TF	-0.37	-0.26	-0.388423	-0.266108
Str		0.13	0.2	0.13074	0.202733
Flex		0.34	0.15	0.354093	0.15114
Fin		0.56	0.39	0.632833	0.4118
Qc		0.57	0.48	0.647523	0.522984
StrPr		-0.11	-0.03	-0.110447	-0.030009
LFPr		0.18	0.25	0.181983	0.255413
TFPr		0.27	0.35	0.276864	0.365444
SePr		-0.4	-0.46	-0.423649	-0.497311
Se1000		-0.18	-0.27	-0.181983	-0.276864
s-mT		-0.28	-0.11	-0.287682	-0.110447
g-mT		-0.24	-0.02	-0.244774	-0.0200027
s-mP		0.07	0.17	0.0701147	0.171667
g-mP		0.07	0.15	0.0701147	0.15114
s-gAT		-0.12	-0.16	-0.120581	-0.161387
s-gP		0.01	0.11	0.0100003	0.110447
g-fAT		0.1	0.29	0.100335	0.298566
g-fP		0.21	0.38	0.213171	0.40006
f-mAT		-0.41	-0.36	-0.435611	-0.376886
f-mP		-0.05	-0.05	-0.0500417	-0.0500417
g-mAT		-0.23	-0.08	-0.234189	-0.0801713
s-gHTC		0.13	0.16	0.13074	0.161387
g-fHTC		0.19	0.32	0.192337	0.331647
f-mHTC		0.01	0	0.0100003	0
s-mHTC		0.13	0.19	0.13074	0.192337
Str	Qo	0.33	0.51	0.342828	0.56273
Flex		0.02	0.04	0.0200027	0.0400214
Fin		-0.52	-0.47	-0.57634	-0.51007
Qc		-0.14	-0.01	-0.140926	-0.0100003
StrPr		0.36	0.19	0.376886	0.192337
LFPr		0.15	0.14	0.15114	0.140926
TFPr		0.21	0.07	0.213171	0.0701147
SePr		0.42	0.18	0.447692	0.181983
Se1000		0.49	0.05	0.53606	0.0500417
s-mT		0.44	0.53	0.472231	0.590145
g-mT		0.39	0.49	0.4118	0.53606
s-mP		0.01	0.07	0.0100003	0.0701147
g-mP		0	0.05	0	0.0500417
s-gAT		0.24	0.23	0.244774	0.234189
s-gP		0.1	0.09	0.100335	0.0902442
g-fAT		0.34	0.42	0.354093	0.447692
g-fP		0.07	0.1	0.0701147	0.100335
f-mAT		0.24	0.29	0.244774	0.298566
f-mP		-0.05	0.01	-0.0500417	0.0100003
g-mAT		0.41	0.51	0.435611	0.56273
s-gHTC		0.1	0.06	0.100335	0.0600722
g-fHTC		0	-0.01	0	-0.0100003
f-mHTC		-0.11	-0.03	-0.110447	-0.030009
s-mHTC		-0.08	-0.03	-0.0801713	-0.030009
Flex	Se1000	-0.1	-0.28	-0.100335	-0.287682
Fin		-0.21	-0.39	-0.213171	-0.4118
Qc		0.32	0.15	0.331647	0.15114
StrPr		0.13	0.03	0.13074	0.030009
LFPr		0.25	0.18	0.255413	0.181983
TFPr		0.18	0.08	0.181983	0.0801713
SePr		0.17	0.01	0.171667	0.0100003
Se1000		0.22	-0.11	0.223656	-0.110447
s-mT		-0.08	0.14	-0.0801713	0.140926
g-mT		-0.05	0.3	-0.0500417	0.30952
s-mP		-0.06	0.04	-0.0600722	0.0400214
g-mP		-0.11	0	-0.110447	0
s-gAT		-0.16	-0.12	-0.161387	-0.120581
s-gP		0.37	0.21	0.388423	0.213171
g-fAT		0.31	0.58	0.320545	0.662463
g-fP		0.26	0.2	0.266108	0.202733
f-mAT		-0.22	-0.09	-0.223656	-0.0902442
f-mP		-0.33	-0.13	-0.342828	-0.13074
g-mAT		-0.04	0.25	-0.0400214	0.255413
s-gHTC		0.4	0.28	0.423649	0.287682
g-fHTC		0.19	0.05	0.192337	0.0500417
f-mHTC		-0.34	-0.13	-0.354093	-0.13074
s-mHTC		-0.04	-0.02	-0.0400214	-0.0200027
Fin	Flex	0.55	0.44	0.618381	0.472231
Qc		0.78	0.7	1.04537	0.867301
StrPr		-0.03	-0.09	-0.030009	-0.0902442
LFPr		0.12	0.01	0.120581	0.0100003
TFPr		0.1	-0.03	0.100335	-0.030009
SePr		-0.25	-0.18	-0.255413	-0.181983
Se1000		-0.18	0.07	-0.181983	0.0701147
s-mT		-0.23	-0.22	-0.234189	-0.223656
g-mT		-0.28	-0.38	-0.287682	-0.40006
s-mP		-0.14	-0.26	-0.140926	-0.266108
g-mP		-0.18	-0.29	-0.181983	-0.298566
s-gAT		-0.1	0	-0.100335	0
s-gP		0.31	0.23	0.320545	0.234189
g-fAT		-0.18	-0.29	-0.181983	-0.298566
g-fP		-0.17	-0.3	-0.171667	-0.30952
f-mAT		-0.2	-0.24	-0.202733	-0.244774
f-mP		-0.14	-0.21	-0.140926	-0.213171
g-mAT		-0.24	-0.3	-0.244774	-0.30952
s-gHTC		0.35	0.25	0.365444	0.255413
g-fHTC		-0.11	-0.19	-0.110447	-0.192337
f-mHTC		-0.11	-0.16	-0.110447	-0.161387
s-mHTC		-0.06	-0.16	-0.0600722	-0.161387
Qc	Fin	0.77	0.73	1.02033	0.928727
StrPr		-0.37	-0.35	-0.388423	-0.365444
LFPr		-0.1	-0.17	-0.100335	-0.171667
TFPr		-0.15	-0.18	-0.15114	-0.181983
SePr		-0.49	-0.35	-0.53606	-0.365444
Se1000		-0.29	-0.24	-0.298566	-0.244774
s-mT		-0.34	-0.37	-0.354093	-0.388423
g-mT		-0.36	-0.49	-0.376886	-0.53606
s-mP		-0.11	-0.24	-0.110447	-0.244774
g-mP		-0.12	-0.25	-0.120581	-0.255413
s-gAT		-0.14	-0.02	-0.140926	-0.0200027
s-gP		0.1	0.06	0.100335	0.0600722
g-fAT		-0.15	-0.2	-0.15114	-0.202733
g-fP		-0.06	-0.13	-0.0600722	-0.13074
f-mAT		-0.27	-0.34	-0.276864	-0.354093
f-mP		-0.14	-0.28	-0.140926	-0.287682
g-mAT		-0.29	-0.3	-0.298566	-0.30952
s-gHTC		-0.01	-0.1	-0.0100003	-0.100335
g-fHTC		-0.02	-0.05	-0.0200027	-0.0500417
f-mHTC		-0.1	-0.23	-0.100335	-0.234189
s-mHTC		-0.04	-0.17	-0.0400214	-0.171667
StrPr	Qc	-0.18	-0.28	-0.181983	-0.287682
LFPr		0.12	-0.01	0.120581	-0.0100003
TFPr		0.05	-0.1	0.0500417	-0.100335
SePr		-0.33	-0.33	-0.342828	-0.342828
Se1000		-0.15	-0.2	-0.15114	-0.202733
s-mT		-0.36	-0.3	-0.376886	-0.30952
g-mT		-0.38	-0.38	-0.40006	-0.40006
s-mP		-0.17	-0.3	-0.171667	-0.30952
g-mP		-0.22	-0.34	-0.223656	-0.354093
s-gAT		-0.21	-0.09	-0.213171	-0.0902442
s-gP		0.4	0.3	0.423649	0.30952
g-fAT		-0.03	0.04	-0.030009	0.0400214
g-fP		0.01	-0.14	0.0100003	-0.140926
f-mAT		-0.37	-0.43	-0.388423	-0.459897
f-mP		-0.31	-0.39	-0.320545	-0.4118
g-mAT		-0.31	-0.23	-0.320545	-0.234189
s-gHTC		0.37	0.24	0.388423	0.244774
g-fHTC		0.03	-0.11	0.030009	-0.110447
f-mHTC		-0.28	-0.33	-0.287682	-0.342828
s-mHTC		-0.07	-0.21	-0.0701147	-0.213171
LFPr	StrPr	0.86	0.88	1.29334	1.37577
TFPr		0.92	0.92	1.58903	1.58903
SePr		0.63	0.53	0.741416	0.590145
Se1000		0.51	0.6	0.56273	0.693147
s-mT		-0.03	0.09	-0.030009	0.0902442
g-mT		0.12	0.34	0.120581	0.354093
s-mP		0.04	0.08	0.0400214	0.0801713
g-mP		0.07	0.1	0.0701147	0.100335
s-gAT		-0.21	-0.22	-0.213171	-0.223656
s-gP		-0.17	-0.11	-0.171667	-0.110447
g-fAT		0.03	0.1	0.030009	0.100335
g-fP		0.16	0.22	0.161387	0.223656
f-mAT		-0.03	0.16	-0.030009	0.161387
f-mP		-0.02	-0.01	-0.0200027	-0.0100003
g-mAT		-0.09	0.04	-0.0902442	0.0400214
s-gHTC		-0.04	0.02	-0.0400214	0.0200027
g-fHTC		0.17	0.18	0.171667	0.181983
f-mHTC		-0.01	-0.05	-0.0100003	-0.0500417
s-mHTC		0.08	0.08	0.0801713	0.0801713
TFPr	LFPr	0.91	0.92	1.52752	1.58903
SePr		0.34	0.35	0.354093	0.365444
Se1000		0.33	0.48	0.342828	0.522984
s-mT		-0.25	-0.05	-0.255413	-0.0500417
g-mT		-0.1	0.22	-0.100335	0.223656
s-mP		0.06	0.08	0.0600722	0.0801713
g-mP		0.06	0.08	0.0600722	0.0801713
s-gAT		-0.35	-0.32	-0.365444	-0.331647
s-gP		-0.06	0	-0.0600722	0
g-fAT		0	0.19	0	0.192337
g-fP		0.27	0.32	0.276864	0.331647
f-mAT		-0.24	-0.08	-0.244774	-0.0801713
f-mP		-0.09	-0.1	-0.0902442	-0.100335
g-mAT		-0.29	-0.07	-0.298566	-0.0701147
s-gHTC		0.11	0.15	0.110447	0.15114
g-fHTC		0.29	0.27	0.298566	0.276864
f-mHTC		-0.05	-0.11	-0.0500417	-0.110447
s-mHTC		0.15	0.11	0.15114	0.110447
SePr	TFPr	0.44	0.29	0.472231	0.298566
Se1000		0.42	0.45	0.447692	0.4847
s-mT		-0.12	0.04	-0.120581	0.0400214
g-mT		0.02	0.29	0.0200027	0.298566
s-mP		0.08	0.14	0.0801713	0.140926
g-mP		0.1	0.15	0.100335	0.15114
s-gAT		-0.23	-0.25	-0.234189	-0.255413
s-gP		-0.17	-0.07	-0.171667	-0.0701147
g-fAT		0.05	0.19	0.0500417	0.192337
g-fP		0.24	0.35	0.244774	0.365444
f-mAT		-0.18	0	-0.181983	0
f-mP		-0.02	-0.02	-0.0200027	-0.0200027
g-mAT		-0.17	0	-0.171667	0
s-gHTC		0	0.07	0	0.0701147
g-fHTC		0.24	0.3	0.244774	0.30952
f-mHTC		0.02	-0.04	0.0200027	-0.0400214
s-mHTC		0.14	0.15	0.140926	0.15114
Se1000	SePr	0.73	0.61	0.928727	0.708921
s-mT		0.16	-0.07	0.161387	-0.0701147
g-mT		0.26	0.07	0.266108	0.0701147
s-mP		-0.1	-0.2	-0.100335	-0.202733
g-mP		-0.06	-0.16	-0.0600722	-0.161387
s-gAT		-0.1	-0.21	-0.100335	-0.213171
s-gP		-0.22	-0.25	-0.223656	-0.255413
g-fAT		0.04	-0.16	0.0400214	-0.161387
g-fP		-0.05	-0.04	-0.0500417	-0.0400214
f-mAT		0.2	0.16	0.202733	0.161387
f-mP		-0.06	-0.2	-0.0600722	-0.202733
g-mAT		0.09	-0.12	0.0902442	-0.120581
s-gHTC		-0.09	-0.15	-0.0902442	-0.15114
g-fHTC		-0.04	-0.01	-0.0400214	-0.0100003
f-mHTC		-0.13	-0.26	-0.13074	-0.266108
s-mHTC		-0.13	-0.18	-0.13074	-0.181983
s-mT	Se1000	0.28	-0.14	0.287682	-0.140926
g-mT		0.44	0.06	0.472231	0.0600722
s-mP		-0.01	-0.01	-0.0100003	-0.0100003
g-mP		0	-0.02	0	-0.0200027
s-gAT		-0.18	-0.41	-0.181983	-0.435611
s-gP		-0.12	0.06	-0.120581	0.0600722
g-fAT		0.16	-0.24	0.161387	-0.244774
g-fP		0.03	0.02	0.030009	0.0200027
f-mAT		0.39	0.19	0.4118	0.192337
f-mP		-0.01	-0.05	-0.0100003	-0.0500417
g-mAT		0.22	-0.25	0.223656	-0.255413
s-gHTC		0.04	0.2	0.0400214	0.202733
g-fHTC		0	0.08	0	0.0801713
f-mHTC		-0.11	-0.08	-0.110447	-0.0801713
s-mHTC		-0.08	0.06	-0.0801713	0.0600722
g-mT	s-mT	0.87	0.79	1.33308	1.07143
s-mP		0.4	0.34	0.423649	0.354093
g-mP		0.4	0.36	0.423649	0.376886
s-gAT		0.63	0.63	0.741416	0.741416
s-gP		-0.09	-0.14	-0.0902442	-0.140926
g-fAT		0.42	0.43	0.447692	0.459897
g-fP		0.06	0.17	0.0600722	0.171667
f-mAT		0.83	0.76	1.18814	0.996215
f-mP		0.53	0.4	0.590145	0.423649
g-mAT		0.95	0.93	1.83178	1.65839
s-gHTC		-0.26	-0.26	-0.266108	-0.266108
g-fHTC		-0.04	0.04	-0.0400214	0.0400214
f-mHTC		0.41	0.28	0.435611	0.287682
s-mHTC		0.16	0.11	0.161387	0.110447
s-mP	g-mT	0.41	0.38	0.435611	0.40006
g-mP		0.43	0.41	0.459897	0.435611
s-gAT		0.21	0.1	0.213171	0.100335
s-gP		-0.18	-0.21	-0.181983	-0.213171
g-fAT		0.59	0.65	0.677666	0.775299
g-fP		0.16	0.29	0.161387	0.298566
f-mAT		0.87	0.73	1.33308	0.928727
f-mP		0.49	0.39	0.53606	0.4118
g-mAT		0.87	0.8	1.33308	1.09861
s-gHTC		-0.17	-0.11	-0.171667	-0.110447
g-fHTC		0.02	0.09	0.0200027	0.0902442
f-mHTC		0.37	0.29	0.388423	0.298566
s-mHTC		0.19	0.19	0.192337	0.192337
g-mP	s-mP	0.99	0.99	2.64665	2.64665
s-gAT		0.05	-0.03	0.0500417	-0.030009
s-gP		-0.02	0.02	-0.0200027	0.0200027
g-fAT		0.12	0.1	0.120581	0.100335
g-fP		0.76	0.78	0.996215	1.04537
f-mAT		0.37	0.32	0.388423	0.331647
f-mP		0.87	0.87	1.33308	1.33308
g-mAT		0.29	0.21	0.298566	0.213171
s-gHTC		0.11	0.16	0.110447	0.161387
g-fHTC		0.73	0.74	0.928727	0.950479
f-mHTC		0.89	0.88	1.42193	1.37577
s-mHTC		0.96	0.97	1.94591	2.0923
s-gAT	g-mP	0.06	-0.01	0.0600722	-0.0100003
s-gP		-0.17	-0.13	-0.171667	-0.13074
g-fAT		0.11	0.11	0.110447	0.110447
g-fP		0.75	0.77	0.972955	1.02033
f-mAT		0.39	0.33	0.4118	0.342828
f-mP		0.89	0.89	1.42193	1.42193
g-mAT		0.3	0.22	0.30952	0.223656
s-gHTC		0.01	0.05	0.0100003	0.0500417
g-fHTC		0.73	0.74	0.928727	0.950479
f-mHTC		0.91	0.9	1.52752	1.47222
s-mHTC		0.95	0.95	1.83178	1.83178
s-gP	s-gAT	-0.06	-0.11	-0.0600722	-0.110447
g-fAT		-0.02	-0.07	-0.0200027	-0.0701147
g-fP		-0.25	-0.2	-0.255413	-0.202733
f-mAT		0.29	0.3	0.298566	0.30952
f-mP		0.25	0.13	0.255413	0.13074
g-mAT		0.59	0.57	0.677666	0.647523
s-gHTC		-0.46	-0.48	-0.497311	-0.522984
g-fHTC		-0.24	-0.18	-0.244774	-0.181983
f-mHTC		0.19	0.06	0.192337	0.0600722
s-mHTC		-0.12	-0.18	-0.120581	-0.181983
g-fAT	s-gP	0.07	-0.05	0.0701147	-0.0500417
g-fP		0	-0.02	0	-0.0200027
f-mAT		-0.13	-0.08	-0.13074	-0.0801713
f-mP		-0.23	-0.18	-0.234189	-0.181983
g-mAT		-0.06	-0.12	-0.0600722	-0.120581
s-gHTC		0.7	0.71	0.867301	0.887184
g-fHTC		-0.04	-0.04	-0.0400214	-0.0400214
f-mHTC		-0.23	-0.18	-0.234189	-0.181983
s-mHTC		0	0.06	0	0.0600722
g-fP	g-fAT	0.15	0.16	0.15114	0.161387
f-mAT		0.2	0.12	0.202733	0.120581
f-mP		0.05	0.05	0.0500417	0.0500417
g-mAT		0.61	0.63	0.708921	0.741416
s-gHTC		0.06	0.04	0.0600722	0.0400214
g-fHTC		-0.09	-0.12	-0.0902442	-0.120581
f-mHTC		0.01	0.02	0.0100003	0.0200027
s-mHTC		-0.03	-0.05	-0.030009	-0.0500417
f-mAT	g-fP	-0.03	0.03	-0.030009	0.030009
f-mP		0.37	0.4	0.388423	0.423649
g-mAT		-0.05	0.02	-0.0500417	0.0200027
s-gHTC		0.21	0.12	0.213171	0.120581
g-fHTC		0.97	0.96	2.0923	1.94591
f-mHTC		0.44	0.44	0.472231	0.472231
s-mHTC		0.82	0.8	1.15682	1.09861
f-mP	f-mAT	0.56	0.46	0.632833	0.497311
g-mAT		0.79	0.71	1.07143	0.887184
s-gHTC		-0.19	-0.17	-0.192337	-0.171667
g-fHTC		-0.08	-0.04	-0.0801713	-0.0400214
f-mHTC		0.42	0.31	0.447692	0.320545
s-mHTC		0.17	0.14	0.171667	0.140926
g-mAT	f-mP	0.45	0.32	0.4847	0.331647
s-gHTC		-0.13	-0.02	-0.13074	-0.0200027
g-fHTC		0.37	0.39	0.388423	0.4118
f-mHTC		0.98	0.98	2.29756	2.29756
s-mHTC		0.77	0.8	1.02033	1.09861
s-gHTC	g-mAT	-0.27	-0.29	-0.276864	-0.298566
g-fHTC		-0.2	-0.17	-0.202733	-0.171667
f-mHTC		0.32	0.19	0.331647	0.192337
s-mHTC		0.03	-0.04	0.030009	-0.0400214
g-fHTC	s-gHTC	0.19	0.1	0.192337	0.100335
f-mHTC		-0.1	0.02	-0.100335	0.0200027
s-mHTC		0.2	0.25	0.202733	0.255413
f-mHTC	g-fHTC	0.45	0.44	0.4847	0.472231
s-mHTC		0.84	0.81	1.22117	1.12703
s-mHTC	f-mHTC	0.83	0.84	1.18814	1.22117
					0.957007
