# Supplementary material for: Influence of Weather Conditions in the Northwestern Russian Federation on Flax Fiber Characters According to the Results of a 30-Year Study
Source: Plants (Basel). 2024 Mar 7;13(6):762. doi: 10.3390/plants13060762 (PMC10975659; doi:10.3390/plants13060762)
Supplement: Supplementary file 1 [file plants-13-00762-s001.zip › Table S6.xlsx]

## Sheet: Initial data
	Factor Scores for weather condition
year	FACTOR1	FACTOR2	FACTOR3	FACTOR4	FACTOR5	Number of CLUSTER	DISTANC	may1dAT	may2dAT	may3dAT	mayAT	jun1dAT	jun2dAT	jun3dAT	junAT	jul1dAT	jul2dAT	jul3dAT	julAT	aug1dAT	aug2dAT	aug3dAT	augAT	may-augAT	may1dP	may2dP	may3dP	mayP	jun1dP	jun2dP	jun3dP	junP	jul1dP	jul2dP	jul3dP	julP	aug1dP	aug2dP	aug3dP	augP	may-augP	mayHTC	junHTC	julHTC	augHTC	may-augHTC	mayET	junET	julET
1987	-0.946826	-1.84799	0.136597	-1.85454	-1.83646	2	1.09297	68.6	115.5	36.3	220.4	148.9	152.9	142.6	444.4	168	121.7	189.7	479.4	139.4	119.6	136.1	395.1	1539.3	18.3	20.5	28.3	67.1	30.4	32.6	74.8	137.8	1.3	1.9	41.4	44.6	77.9	51.5	39.3	168.7	418.2	3.04446	3.10081	0.93033	4.26981	2.71758	0	20.4	65.1
1988	1.18863	-0.932054	1.04146	-1.21447	1.51215	6	0.596886	42.1	106.6	188.4	337.1	171.1	138.9	222.1	532.1	197.9	228	205.8	631.7	146.8	147.9	172.3	467	1967.9	6.3	8.8	4.5	19.6	8.5	42.8	38	89.3	9	62	43.3	114.3	41.6	51.5	58.7	151.8	375	0.58143	1.67826	1.8094	3.25054	1.90558	21.1	271.1	426.1
1989	-1.15815	-0.987544	2.21622	-0.258647	0.429694	7	0.706354	76.9	125.7	147.1	349.7	183.3	151.5	215.3	550.1	198.5	163.8	201.7	564	170.6	168.9	114.5	454	1917.8	2.9	25.9	3.7	32.5	9.2	14.1	11.8	35.1	32.2	18.3091	107.3	157.809	100.3	13.5	23.8	137.6	363.009	0.929368	0.638066	2.79803	3.03084	1.89284	20.5	261	109.4
1990	-1.48907	1.09596	-0.60081	-0.357701	-0.0984868	4	0.652507	106.1	34.1	34.9	175.1	105.4	103	177	385.4	186.7	155.3	170	512	174.1	174.8	131.4	480.3	1552.8	0.2	19.1	29.8	49.1	0.9	7.7	0.2	8.8	30.4	15.4182	22.2	68.0182	11.6	14.8	27.1	53.5	179.418	2.80411	0.228334	1.32848	1.11389	1.15545	0	21.5	62.2
1991	-0.0398554	0.415696	-0.490209	-0.758357	-0.839938	2	0.419458	31.7	120.6	77.2	229.5	110.3	152.1	187	449.4	196.4	177.6	196	570	191.7	152.3	174.9	518.9	1767.8	28.6	12.4	22.4	63.4	47.1	18.6	8.2	73.9	32	17.8091	2.6	52.4091	8.3	44.3	1.7	54.3	244.009	2.76253	1.64441	0.919458	1.04644	1.3803	0	83.2	149.3
1992	-0.265322	1.41848	-0.335359	-0.178103	1.25932	4	0.40204	42.3	76.9	154.2	273.4	157.9	186.7	156.1	500.7	146	190.3	210.4	546.7	179.7	166.6	161.4	507.7	1828.5	11.1	5.7	0	16.8	0	6.4	18	24.4	22.5	19.2727	11.7	53.4727	0.4	16.2	25.6	42.2	136.873	0.614484	0.487318	0.9781	0.8312	0.748552	41.8	127.8	150.7
1994	0.558549	0.102208	-1.18706	-1.53536	-0.389628	2	0.640008	53.6	39.6	47.2	140.4	129.6	118.4	159.6	407.6	178.9	207.1	220.2	606.2	200.5	101.2	145.5	447.2	1601.4	13	6.4	23.4	42.8	37.3	28.9	20.3	86.5	48.4	20.3909	0.5	69.2909	3.8	54.7	10.7	69.2	267.791	3.04843	2.12218	1.14304	1.54741	1.67223	0	20.8	334.1
1995	-0.828875	0.800466	1.3004	-0.39069	-0.770802	3	0.764839	21.5	64.4	195.7	281.6	205.4	198.7	171.1	575.2	139.7	158.4	197.3	495.4	164.6	158.5	188.6	511.7	1863.9	14.9	33	19.8	67.7	31.2	10.7	10.1	52	18.2	17.2182	23	58.4182	31.3	0	0.4	31.7	209.818	2.40412	0.904033	1.17921	0.619504	1.12569	88.4	291.5	63.5
1996	-1.88418	0.633134	-0.127355	0.515032	-1.62486	3	0.580205	45.6	60.2	108.8	214.6	162.9	129.5	143.9	436.3	174	130.1	179.2	483.3	163.6	192.2	180.3	536.1	1670.3	23.2	17.2	43	83.4	3.6	11.8	18.9	34.3	50.6	16.5455	33.1	100.245	11.4	0.5	0	11.9	229.845	3.8863	0.786156	2.07419	0.221974	1.37607	0	20.4	64
1997	0.171254	1.34315	-0.11507	-0.323247	-0.379078	4	0.473554	24.7	84.8	61.5	171	158.3	152.3	165	475.6	206.9	161.1	219	587	196.6	146.2	220.8	563.6	1797.2	8.9	3.5	25.5	37.9	14	7.6	18.1	39.7	0	19.9364	31.5	51.4364	0	15.5	0	15.5	144.5	2.21637	0.834735	0.876258	0.28	0.8	0	148.9	321.2
1998	-0.44216	-0.926522	-0.0876898	-1.14593	-0.212426	2	0.407902	106.2	104.7	62.3	273.2	162.1	205.9	113.3	481.3	176.5	178.1	196.3	550.9	160.6	128.5	139.6	428.7	1734.1	17.6	0	17.5	35.1	22	28.7	71.5	122.2	64.4	18	18.9	101.3	49.9	21.1	20.8	91.8	350.4	1.28477	2.53896	1.83881	2.14136	2.02064	0	162.5	83.1
1999	0.842652	1.15685	1.26043	-1.81626	0.63891	6	0.604409	0	20.7	150	170.7	176.7	210.2	229.6	616.5	199.3	224.8	199.1	623.2	178.2	148.1	154	480.3	1890.7	5.3	0.9	16.9	23.1	15.8	0	30.8	46.6	5.3	18.1	10	33.4	17.5	32	22.5	72	175.1	1.35325	0.75588	0.535944	1.49906	0.926112	0	386.1	317.3
2000	-0.849675	0.202359	-0.107204	-0.1765	0.610072	4	0.492189	37.9	52.2	165.6	255.7	126	147.1	194.2	467.3	173.4	188.3	193.6	555.3	160.5	162.5	167.3	490.3	1768.6	3.7	8.5	19.5	31.7	16	10.5	43.4	69.9	79.5	17.2818	30	126.782	5.4	12.7	24	42.1	270.482	1.23973	1.49583	2.28312	0.858658	1.52936	21.7	129.4	144.5
2001	0.656971	0.226418	-0.469863	-0.953679	-0.171178	2	0.485636	122.3	66.5	0	188.8	134.4	130.6	177.7	442.7	212	222.6	236.8	671.4	164.4	178	152.5	494.9	1797.8	18.8	10.3	17.6	46.7	38.8	27.7	2.3	68.8	67.7	21.2909	12.3	101.291	22.4	23.2	0.3	45.9	262.691	2.47352	1.5541	1.50865	0.92746	1.46118	0	41	581.8
2002	0.0636267	1.15348	0.0121452	0.641008	0.637639	4	0.333635	136.1	90.5	107.8	334.4	162.1	181.1	157.8	501	191.8	219.6	220.9	632.3	174	198	195	567	2034.7	0.5	24.6	6.6	31.7	6.5	19.4	16.8	42.7	24.3	19.4273	29.7	73.4273	9.1	0	0	9.1	156.927	0.947967	0.852295	1.16127	0.160494	0.771255	0	64.7	359.2
2004	-0.538912	-0.691615	-0.871466	0.333665	-0.647739	2	0.568347	120.8	20.7	58.4	199.9	123.7	140.2	172.4	436.3	167.4	179.8	219.2	566.4	211.7	158.2	174.7	544.6	1747.2	0.5	15.1	37.2	52.8	28.2	26.1	62.7	117	69.8	19.4273	33.2	122.427	9.2	31.6	25.8	66.6	358.827	2.64132	2.68164	2.1615	1.22292	2.05373	0	20.3	206.9
2005	0.177131	-0.487476	-0.0252228	-0.0907373	-0.7103	2	0.327364	0	77.6	176.5	254.1	138.7	165.8	167.4	471.9	189.4	229.4	208.6	627.4	190.5	171.7	188.3	550.5	1903.9	26.2	32	4.4	62.6	43	28.5	36.5	108	33.6	18.6182	54.9	107.118	29.5	16.3	14.9	60.7	338.418	2.4636	2.28862	1.70733	1.10263	1.7775	23.9	21.8	375.9
2006	-0.0450569	0.961588	0.439735	0.500119	-0.0531196	4	0.44843	135.5	79.5	141.1	356.1	98.9	203.6	201.8	504.3	225.7	191.9	182.3	599.9	180	199.4	192	571.4	2031.7	0	20.7	33	53.7	29.2	2.7	23.5	55.4	33.1	16.5364	2.1	51.7364	9.7	1.8	24.9	36.4	197.236	1.508	1.09855	0.862416	0.637032	0.970795	0	254.4	288.6
2007	-0.383142	0.22222	-0.831478	1.68937	-1.10944	3	0.662334	23.7	136.8	193.2	353.7	165.8	157.2	154.5	477.5	184.8	183.6	193.3	561.7	197.9	210.6	164.9	573.4	1966.3	31.6	7.3	39	77.9	1	37.6	22.3	60.9	23.3	17.7909	12	53.0909	0.8	3	58.4	62.2	254.091	2.20243	1.27539	0.945183	1.08476	1.29223	68.4	0	82.1
2008	-1.35559	-0.28158	-0.87866	-0.243379	1.39553	5	0.536246	82.2	28.4	120.2	230.8	124.4	149.7	163.6	437.7	170.7	183.7	185.1	355.8	140.8	185.3	140	466.1	1490.4	0.4	11.5	5.1	17	13.9	22.1	28.3	64.3	52	17.0364	2.2	71.2364	17	39.2	94.8	151	303.536	0.736568	1.46904	2.00215	3.23965	2.03661	0	0	82.9
2009	0.241567	-0.504898	-1.53225	-0.310352	1.42305	5	0.634749	115.4	68.1	169.5	353	74.6	154.7	178.1	407.4	157.2	196.5	209.8	563.5	173.9	155.7	178.3	507.9	1831.8	3	5.9	1.8	10.7	56.1	60.3	20.8	137.2	24.8	19.1758	16	59.9758	16.5	42.4	38.9	97.8	305.676	0.303116	3.3677	1.06434	1.92558	1.66872	20.3	42.3	126.7
2010	2.2507	-1.04525	-1.24801	0.0464484	-1.52681	1	0.472511	41.2	167.2	118	326.4	121.6	147.6	170.5	439.7	215.5	238.4	266	719.9	224.4	176.7	118.7	519.8	2005.8	36	2.3	36.9	75.2	13.4	38.8	93.7	145.9	5.7	24.1182	16.7	46.5182	9.8	14.8	62.5	87.1	354.718	2.30392	3.31817	0.646176	1.67564	1.76846	41.6	21.9	663.7
2011	1.26261	0.0861472	0.989161	-0.0522089	-0.0563912	6	0.558564	37.8	108.6	133.5	279.9	196.4	176.6	188.2	561.2	241	225.7	265.2	731.9	184.7	174.3	190.5	549.5	2122.5	11.8	11.4	27.5	50.7	0	27	15.1	42.1	51.2	24.1879	44.5	119.888	7.9	41.4	22	71.3	283.988	1.81136	0.750178	1.63804	1.29754	1.33799	0	171.1	674.4
2012	0.548139	-0.608308	-0.099572	0.502607	0.134994	2	0.68381	77	144.9	152.4	374.3	141.3	179.4	168.2	488.9	217.7	182.9	239.3	639.9	184.2	176.6	175.1	535.9	2039	5	8	30.7	43.7	6.3	31.8	29.6	67.7	22	21.7545	13.1	56.8545	50.5	26.6	85.3	162.4	330.655	1.16751	1.38474	0.888491	3.03042	1.62165	0	20.2	412.8
2013	0.631049	-0.331853	2.62702	1.32545	-0.817502	7	0.75593	141.6	174	189.8	505.4	219.8	187.4	241.3	648.5	227.8	198.4	216.9	643.1	218.8	189.8	192	600.6	2397.6	2.7	58	19.6	80.3	12.2	24.5	19.1	55.8	39.5	19.7152	32.9	92.1152	23.2	39.7	30.7	93.6	321.815	1.58884	0.860447	1.43236	1.55844	1.34224	45.2	424.6	410.1
2014	2.03366	0.0202705	-0.566956	1.5965	-0.881509	1	0.472511	40.2	164	195.8	400	201.4	141.6	146	489	192	228	273.3	693.3	247.4	192.9	165.2	605.5	2187.8	4.3	18.8	44.8	67.9	27.1	32.9	26.9	86.9	10.9	24.2606	3.1	38.2606	1	23.7	44.3	69	262.061	1.6975	1.7771	0.551862	1.13955	1.19783	216.3	157.9	589.1
2015	-0.57445	0.93744	0.460683	1.7794	-0.181793	3	0.564433	114.7	102.5	181	398.2	173	173.4	193.9	540.3	193.1	171.4	204.8	569.3	206	191.2	221.2	618.4	2126.2	12.7	11.7	30.5	54.9	1.1	2.5	20.8	24.4	37	18.5909	27.7	83.2909	8.8	13.8	12.7	35.3	197.891	1.3787	0.451601	1.46304	0.570828	0.930726	21.6	130.7	153.4
2016	0.699825	-0.89279	0.922623	0.947829	1.53418	7	0.753506	179.8	157.5	198.4	535.7	160	166.8	204.4	531.2	180	192	236.4	608.4	196.9	169.6	198.5	565	2240.3	0	4.9	12.9	17.8	15	27.5	21.3	63.8	41.9	21.697	52.3	115.897	31	106.7	36.6	174.3	371.797	0.332276	1.20105	1.90495	3.08496	1.65959	102.8	305.3	351.4
2017	-1.15695	-2.59794	-0.778809	1.54129	1.45869	5	0.879939	33.9	95.7	130.9	260.5	106.1	173.8	160.6	440.5	158.6	181.1	209.9	549.6	190.8	202.4	172	565.2	1815.8	0.3	3	3.6	6.9	28.7	46	44.6	119.3	92.1	18.5939	75.8	186.494	59.6	33.3	144.5	237.4	550.094	0.264875	2.70829	3.39327	4.20028	3.02949	0	40.8	106.7
2018	0.631859	1.35995	-1.05343	0.241445	1.27323	4	0.663439	60.2	148.3	147.5	356	90.3	169.2	149.5	409	138.8	217.7	238.2	594.7	213.3	159.7	134.7	507.7	1867.4	18.7	8.2	0	26.9	0	9.2	0	9.2	0	20.8636	34	54.8636	4.3	22.1	16.5	42.9	133.864	0.755618	0.224939	0.922543	0.844987	0.716845	61.7	43.7	419.2
year	F1	F2	F3	F4	F5	CLUSTER	DISTANC	mst1d	mst2d	mst3d	mst	junst1d	junst2d	junst3d	junst	julst1d	julst2d	julst3d	julst	agst1d	agst2d	agst3d	agst	m-agst	mso1d	mso2d	mso3d	mso	junso1d	junso2d	junso3d	junso	julso1d	julso2d	julso3d	julso	agso1d	agso2d	agso3d	agso	m-agso	gtkm	gtkjun	gtkjul	gtkag	gtkm-ag	mb20	junb20	julb20
1987	-0.946826	-1.84799	0.136597	-1.85454	-1.83646	2	1.09297	68.6	115.5	36.3	220.4	148.9	152.9	142.6	444.4	168	121.7	189.7	479.4	139.4	119.6	136.1	395.1	1539.3	18.3	20.5	28.3	67.1	30.4	32.6	74.8	137.8	1.3	1.9	41.4	44.6	77.9	51.5	39.3	168.7	418.2	3.04446	3.10081	0.93033	4.26981	2.71758	0	20.4	65.1
1988	1.18863	-0.932054	1.04146	-1.21447	1.51215	6	0.596886	42.1	106.6	188.4	337.1	171.1	138.9	222.1	532.1	197.9	228	205.8	631.7	146.8	147.9	172.3	467	1967.9	6.3	8.8	4.5	19.6	8.5	42.8	38	89.3	9	62	43.3	114.3	41.6	51.5	58.7	151.8	375	0.58143	1.67826	1.8094	3.25054	1.90558	21.1	271.1	426.1
1989	-1.15815	-0.987544	2.21622	-0.258647	0.429694	7	0.706354	76.9	125.7	147.1	349.7	183.3	151.5	215.3	550.1	198.5	163.8	201.7	564	170.6	168.9	114.5	454	1917.8	2.9	25.9	3.7	32.5	9.2	14.1	11.8	35.1	32.2	18.3091	107.3	157.809	100.3	13.5	23.8	137.6	363.009	0.929368	0.638066	2.79803	3.03084	1.89284	20.5	261	109.4
1990	-1.48907	1.09596	-0.60081	-0.357701	-0.0984868	4	0.652507	106.1	34.1	34.9	175.1	105.4	103	177	385.4	186.7	155.3	170	512	174.1	174.8	131.4	480.3	1552.8	0.2	19.1	29.8	49.1	0.9	7.7	0.2	8.8	30.4	15.4182	22.2	68.0182	11.6	14.8	27.1	53.5	179.418	2.80411	0.228334	1.32848	1.11389	1.15545	0	21.5	62.2
1991	-0.0398554	0.415696	-0.490209	-0.758357	-0.839938	2	0.419458	31.7	120.6	77.2	229.5	110.3	152.1	187	449.4	196.4	177.6	196	570	191.7	152.3	174.9	518.9	1767.8	28.6	12.4	22.4	63.4	47.1	18.6	8.2	73.9	32	17.8091	2.6	52.4091	8.3	44.3	1.7	54.3	244.009	2.76253	1.64441	0.919458	1.04644	1.3803	0	83.2	149.3
1992	-0.265322	1.41848	-0.335359	-0.178103	1.25932	4	0.40204	42.3	76.9	154.2	273.4	157.9	186.7	156.1	500.7	146	190.3	210.4	546.7	179.7	166.6	161.4	507.7	1828.5	11.1	5.7	0	16.8	0	6.4	18	24.4	22.5	19.2727	11.7	53.4727	0.4	16.2	25.6	42.2	136.873	0.614484	0.487318	0.9781	0.8312	0.748552	41.8	127.8	150.7
1994	0.558549	0.102208	-1.18706	-1.53536	-0.389628	2	0.640008	53.6	39.6	47.2	140.4	129.6	118.4	159.6	407.6	178.9	207.1	220.2	606.2	200.5	101.2	145.5	447.2	1601.4	13	6.4	23.4	42.8	37.3	28.9	20.3	86.5	48.4	20.3909	0.5	69.2909	3.8	54.7	10.7	69.2	267.791	3.04843	2.12218	1.14304	1.54741	1.67223	0	20.8	334.1
1995	-0.828875	0.800466	1.3004	-0.39069	-0.770802	3	0.764839	21.5	64.4	195.7	281.6	205.4	198.7	171.1	575.2	139.7	158.4	197.3	495.4	164.6	158.5	188.6	511.7	1863.9	14.9	33	19.8	67.7	31.2	10.7	10.1	52	18.2	17.2182	23	58.4182	31.3	0	0.4	31.7	209.818	2.40412	0.904033	1.17921	0.619504	1.12569	88.4	291.5	63.5
1996	-1.88418	0.633134	-0.127355	0.515032	-1.62486	3	0.580205	45.6	60.2	108.8	214.6	162.9	129.5	143.9	436.3	174	130.1	179.2	483.3	163.6	192.2	180.3	536.1	1670.3	23.2	17.2	43	83.4	3.6	11.8	18.9	34.3	50.6	16.5455	33.1	100.245	11.4	0.5	0	11.9	229.845	3.8863	0.786156	2.07419	0.221974	1.37607	0	20.4	64
1997	0.171254	1.34315	-0.11507	-0.323247	-0.379078	4	0.473554	24.7	84.8	61.5	171	158.3	152.3	165	475.6	206.9	161.1	219	587	196.6	146.2	220.8	563.6	1797.2	8.9	3.5	25.5	37.9	14	7.6	18.1	39.7	0	19.9364	31.5	51.4364	0	15.5	0	15.5	144.5	2.21637	0.834735	0.876258	0.28	0.8	0	148.9	321.2
1998	-0.44216	-0.926522	-0.0876898	-1.14593	-0.212426	2	0.407902	106.2	104.7	62.3	273.2	162.1	205.9	113.3	481.3	176.5	178.1	196.3	550.9	160.6	128.5	139.6	428.7	1734.1	17.6	0	17.5	35.1	22	28.7	71.5	122.2	64.4	18	18.9	101.3	49.9	21.1	20.8	91.8	350.4	1.28477	2.53896	1.83881	2.14136	2.02064	0	162.5	83.1
1999	0.842652	1.15685	1.26043	-1.81626	0.63891	6	0.604409	0	20.7	150	170.7	176.7	210.2	229.6	616.5	199.3	224.8	199.1	623.2	178.2	148.1	154	480.3	1890.7	5.3	0.9	16.9	23.1	15.8	0	30.8	46.6	5.3	18.1	10	33.4	17.5	32	22.5	72	175.1	1.35325	0.75588	0.535944	1.49906	0.926112	0	386.1	317.3
2000	-0.849675	0.202359	-0.107204	-0.1765	0.610072	4	0.492189	37.9	52.2	165.6	255.7	126	147.1	194.2	467.3	173.4	188.3	193.6	555.3	160.5	162.5	167.3	490.3	1768.6	3.7	8.5	19.5	31.7	16	10.5	43.4	69.9	79.5	17.2818	30	126.782	5.4	12.7	24	42.1	270.482	1.23973	1.49583	2.28312	0.858658	1.52936	21.7	129.4	144.5
2001	0.656971	0.226418	-0.469863	-0.953679	-0.171178	2	0.485636	122.3	66.5	0	188.8	134.4	130.6	177.7	442.7	212	222.6	236.8	671.4	164.4	178	152.5	494.9	1797.8	18.8	10.3	17.6	46.7	38.8	27.7	2.3	68.8	67.7	21.2909	12.3	101.291	22.4	23.2	0.3	45.9	262.691	2.47352	1.5541	1.50865	0.92746	1.46118	0	41	581.8
2002	0.0636267	1.15348	0.0121452	0.641008	0.637639	4	0.333635	136.1	90.5	107.8	334.4	162.1	181.1	157.8	501	191.8	219.6	220.9	632.3	174	198	195	567	2034.7	0.5	24.6	6.6	31.7	6.5	19.4	16.8	42.7	24.3	19.4273	29.7	73.4273	9.1	0	0	9.1	156.927	0.947967	0.852295	1.16127	0.160494	0.771255	0	64.7	359.2
2004	-0.538912	-0.691615	-0.871466	0.333665	-0.647739	2	0.568347	120.8	20.7	58.4	199.9	123.7	140.2	172.4	436.3	167.4	179.8	219.2	566.4	211.7	158.2	174.7	544.6	1747.2	0.5	15.1	37.2	52.8	28.2	26.1	62.7	117	69.8	19.4273	33.2	122.427	9.2	31.6	25.8	66.6	358.827	2.64132	2.68164	2.1615	1.22292	2.05373	0	20.3	206.9
2005	0.177131	-0.487476	-0.0252228	-0.0907373	-0.7103	2	0.327364	0	77.6	176.5	254.1	138.7	165.8	167.4	471.9	189.4	229.4	208.6	627.4	190.5	171.7	188.3	550.5	1903.9	26.2	32	4.4	62.6	43	28.5	36.5	108	33.6	18.6182	54.9	107.118	29.5	16.3	14.9	60.7	338.418	2.4636	2.28862	1.70733	1.10263	1.7775	23.9	21.8	375.9
2006	-0.0450569	0.961588	0.439735	0.500119	-0.0531196	4	0.44843	135.5	79.5	141.1	356.1	98.9	203.6	201.8	504.3	225.7	191.9	182.3	599.9	180	199.4	192	571.4	2031.7	0	20.7	33	53.7	29.2	2.7	23.5	55.4	33.1	16.5364	2.1	51.7364	9.7	1.8	24.9	36.4	197.236	1.508	1.09855	0.862416	0.637032	0.970795	0	254.4	288.6
2007	-0.383142	0.22222	-0.831478	1.68937	-1.10944	3	0.662334	23.7	136.8	193.2	353.7	165.8	157.2	154.5	477.5	184.8	183.6	193.3	561.7	197.9	210.6	164.9	573.4	1966.3	31.6	7.3	39	77.9	1	37.6	22.3	60.9	23.3	17.7909	12	53.0909	0.8	3	58.4	62.2	254.091	2.20243	1.27539	0.945183	1.08476	1.29223	68.4	0	82.1
2008	-1.35559	-0.28158	-0.87866	-0.243379	1.39553	5	0.536246	82.2	28.4	120.2	230.8	124.4	149.7	163.6	437.7	170.7	183.7	185.1	355.8	140.8	185.3	140	466.1	1490.4	0.4	11.5	5.1	17	13.9	22.1	28.3	64.3	52	17.0364	2.2	71.2364	17	39.2	94.8	151	303.536	0.736568	1.46904	2.00215	3.23965	2.03661	0	0	82.9
2009	0.241567	-0.504898	-1.53225	-0.310352	1.42305	5	0.634749	115.4	68.1	169.5	353	74.6	154.7	178.1	407.4	157.2	196.5	209.8	563.5	173.9	155.7	178.3	507.9	1831.8	3	5.9	1.8	10.7	56.1	60.3	20.8	137.2	24.8	19.1758	16	59.9758	16.5	42.4	38.9	97.8	305.676	0.303116	3.3677	1.06434	1.92558	1.66872	20.3	42.3	126.7
2010	2.2507	-1.04525	-1.24801	0.0464484	-1.52681	1	0.472511	41.2	167.2	118	326.4	121.6	147.6	170.5	439.7	215.5	238.4	266	719.9	224.4	176.7	118.7	519.8	2005.8	36	2.3	36.9	75.2	13.4	38.8	93.7	145.9	5.7	24.1182	16.7	46.5182	9.8	14.8	62.5	87.1	354.718	2.30392	3.31817	0.646176	1.67564	1.76846	41.6	21.9	663.7
2011	1.26261	0.0861472	0.989161	-0.0522089	-0.0563912	6	0.558564	37.8	108.6	133.5	279.9	196.4	176.6	188.2	561.2	241	225.7	265.2	731.9	184.7	174.3	190.5	549.5	2122.5	11.8	11.4	27.5	50.7	0	27	15.1	42.1	51.2	24.1879	44.5	119.888	7.9	41.4	22	71.3	283.988	1.81136	0.750178	1.63804	1.29754	1.33799	0	171.1	674.4
2012	0.548139	-0.608308	-0.099572	0.502607	0.134994	2	0.68381	77	144.9	152.4	374.3	141.3	179.4	168.2	488.9	217.7	182.9	239.3	639.9	184.2	176.6	175.1	535.9	2039	5	8	30.7	43.7	6.3	31.8	29.6	67.7	22	21.7545	13.1	56.8545	50.5	26.6	85.3	162.4	330.655	1.16751	1.38474	0.888491	3.03042	1.62165	0	20.2	412.8
2013	0.631049	-0.331853	2.62702	1.32545	-0.817502	7	0.75593	141.6	174	189.8	505.4	219.8	187.4	241.3	648.5	227.8	198.4	216.9	643.1	218.8	189.8	192	600.6	2397.6	2.7	58	19.6	80.3	12.2	24.5	19.1	55.8	39.5	19.7152	32.9	92.1152	23.2	39.7	30.7	93.6	321.815	1.58884	0.860447	1.43236	1.55844	1.34224	45.2	424.6	410.1
2014	2.03366	0.0202705	-0.566956	1.5965	-0.881509	1	0.472511	40.2	164	195.8	400	201.4	141.6	146	489	192	228	273.3	693.3	247.4	192.9	165.2	605.5	2187.8	4.3	18.8	44.8	67.9	27.1	32.9	26.9	86.9	10.9	24.2606	3.1	38.2606	1	23.7	44.3	69	262.061	1.6975	1.7771	0.551862	1.13955	1.19783	216.3	157.9	589.1
2015	-0.57445	0.93744	0.460683	1.7794	-0.181793	3	0.564433	114.7	102.5	181	398.2	173	173.4	193.9	540.3	193.1	171.4	204.8	569.3	206	191.2	221.2	618.4	2126.2	12.7	11.7	30.5	54.9	1.1	2.5	20.8	24.4	37	18.5909	27.7	83.2909	8.8	13.8	12.7	35.3	197.891	1.3787	0.451601	1.46304	0.570828	0.930726	21.6	130.7	153.4
2016	0.699825	-0.89279	0.922623	0.947829	1.53418	7	0.753506	179.8	157.5	198.4	535.7	160	166.8	204.4	531.2	180	192	236.4	608.4	196.9	169.6	198.5	565	2240.3	0	4.9	12.9	17.8	15	27.5	21.3	63.8	41.9	21.697	52.3	115.897	31	106.7	36.6	174.3	371.797	0.332276	1.20105	1.90495	3.08496	1.65959	102.8	305.3	351.4
2017	-1.15695	-2.59794	-0.778809	1.54129	1.45869	5	0.879939	33.9	95.7	130.9	260.5	106.1	173.8	160.6	440.5	158.6	181.1	209.9	549.6	190.8	202.4	172	565.2	1815.8	0.3	3	3.6	6.9	28.7	46	44.6	119.3	92.1	18.5939	75.8	186.494	59.6	33.3	144.5	237.4	550.094	0.264875	2.70829	3.39327	4.20028	3.02949	0	40.8	106.7
2018	0.631859	1.35995	-1.05343	0.241445	1.27323	4	0.663439	60.2	148.3	147.5	356	90.3	169.2	149.5	409	138.8	217.7	238.2	594.7	213.3	159.7	134.7	507.7	1867.4	18.7	8.2	0	26.9	0	9.2	0	9.2	0	20.8636	34	54.8636	4.3	22.1	16.5	42.9	133.864	0.755618	0.224939	0.922543	0.844987	0.716845	61.7	43.7	419.2
av								70.6533	94.56	128.107	293.32	147.68	161.53	175.757	484.967	186.857	190.91	212.81	584.453	184.22	168.58	168.01	520.81	1883.55	10.8833	13.8533	20.1833	44.92	18.55	22.8333	28.28	69.6633	34.09	20.1756	27.9333	82.1989	22.3233	26.93	32.2567	81.51	278.291	1.69155	1.48263	1.4316	1.61379	1.49624	26.51	123.51	272.513
[truncated: 3 more columns]

## Sheet: tree
	cl1	cl2	cl3	cl4	cl5	cl6	cl7
cl1		1.22785	1.55071	1.55429	1.78702	1.5828	1.72862
cl2	1.22785		1.0077	0.90971	1.14218	1.04994	1.27931
cl3	1.55071	1.0077		0.832867	1.45694	1.51634	1.23174
cl4	1.55429	0.90971	0.832867		1.16398	1.07789	1.30419
cl5	1.78702	1.14218	1.45694	1.16398		1.54888	1.47878
cl6	1.5828	1.04994	1.51634	1.07789	1.54888		1.04474
cl7	1.72862	1.27931	1.23174	1.30419	1.47878	1.04474
Means	1.34733	0.945243	1.08518	0.977561	1.2254	1.11723	1.15248
Std.Dev.	0.620206	0.435864	0.549178	0.49418	0.584547	0.551045	0.551303

## Sheet: ANOVA for Factors
	Between SS	df	Within SS	df	F	signif. p
FACTOR1	18.3458	6	10.6542	23	6.60075	0.000369463
FACTOR2	17.6207	6	11.3793	23	5.93585	0.000734292
FACTOR3	21.531	6	7.46905	23	11.0503	8.25215e-06
FACTOR4	13.2251	6	15.7749	23	3.21372	0.0192851
FACTOR5	18.535	6	10.465	23	6.78936	0.000306124

## Sheet: Claster members
Descriptive Statistics for Cluster 1						Members of Cluster Number 1
Cluster contains 2 cases						and Distances from Respective
Cl1	Mean	Standard Deviation	Variance			Cluster Center
F1	2.14218	0.15347	0.0235531			Cluster contains 2 cases
F2	-0.512488	0.753435	0.567664
F3	-0.907483	0.481579	0.231918				Distance
F4	0.821474	1.09605	1.20133			2010	0.472511
F5	-1.20416	0.456295	0.208205			2014	0.472511
Descriptive Statistics for Cluster 2
Cluster contains 8 cases							Distance			Distance
	Mean	Standard Deviation	Variance			1987	1.09297		1987	1.09297
F1	-0.00337042	0.592733	0.351332			1991	0.419458		2012	0.68381
F2	-0.477199	0.734096	0.538897			1994	0.640008		1994	0.640008
F3	-0.386811	0.458189	0.209937			1998	0.407902		2004	0.568347
F4	-0.687791	0.86041	0.740305			2001	0.485636		2001	0.485636
F5	-0.584085	0.599691	0.359629			2004	0.568347		1991	0.419458
						2005	0.327364		1998	0.407902
						2012	0.68381		2005	0.327364
Descriptive Statistics for Cluster 3
Cluster contains 4 cases
	Mean	Standard Deviation	Variance				Distance			Distance
F1	-0.917662	0.669713	0.448515			1995	0.764839		1995	0.764839
F2	0.648315	0.310124	0.096177			1996	0.580205		2007	0.662334
F3	0.200563	0.903686	0.816649			2007	0.662334		1996	0.580205
F4	0.898277	1.03449	1.07017			2015	0.564433		2015	0.564433
F5	-0.921723	0.605504	0.366635
Descriptive Statistics for Cluster 4
Cluster contains 7 cases
	Mean	Standard Deviation	Variance				Distance			Distance
F1	-0.254627	0.705985	0.498415			1990	0.652507		2018	0.663439
F2	1.07642	0.418733	0.175338			1992	0.40204		1990	0.652507
F3	-0.251428	0.475901	0.226482			1997	0.473554		2000	0.492189
F4	0.0495744	0.40772	0.166236			2000	0.492189		1997	0.473554
F5	0.464226	0.662504	0.438912			2002	0.333635		2006	0.44843
						2006	0.44843		1992	0.40204
						2018	0.663439		2002	0.333635
Descriptive Statistics for Cluster 5
Cluster contains 3 cases
	Mean	Standard Deviation	Variance				Distance			Distance
F1	-0.756989	0.87046	0.757701			2008	0.536246		2017	0.879939
F2	-1.12814	1.27777	1.6327			2009	0.634749		2009	0.634749
F3	-1.06324	0.409231	0.16747			2017	0.879939		2008	0.536246
F4	0.329187	1.05025	1.10302
F5	1.42575	0.0316674	0.00100283
Descriptive Statistics for Cluster 6
Cluster contains 3 cases
	Mean	Standard Deviation	Variance				Distance			Distance
F1	1.09796	0.224178	0.0502556			1988	0.596886		1988	0.596886
F2	0.103648	1.04456	1.09111			1999	0.604409		1999	0.604409
F3	1.09702	0.143917	0.020712			2011	0.558564		2011	0.558564
F4	-1.02765	0.896742	0.804147
F5	0.698222	0.78595	0.617717
Descriptive Statistics for Cluster 7
Cluster contains 3 cases
	Mean	Standard Deviation	Variance				Distance			Distance
F1	0.0575733	1.05341	1.10968			1989	0.706354		2013	0.75593
F2	-0.737395	0.354392	0.125593			2013	0.75593		2016	0.753506
F3	1.92195	0.889486	0.791185			2016	0.753506		1989	0.706354
F4	0.671544	0.8274	0.684591
F5	0.382123	1.17656	1.3843
